# Supplementary material for: A green synthetic approach to synthesizing diverse 2-pyridones for their exceptional UV shielding functions
Source: Royal Society of Chemistry journal article supplement (doi:10.1039/c6ra18661k), 2016-01-01
Supplement: c6ra18661k1.pdf [file c6ra18661k1.pdf]

## Supporting Information

### Green synthetic approach to diverse 2-pyridones for their exceptional UV shielding functions

Shizuka Mei Bautista Maezono, Tej Narayan Poudel, Likai Xia, and Yong Rok Lee\*

School of Chemical Engineering, Yeungnam University, Gyeongsan 712-749, Republic of Korea  
Email: [yrlee@yu.ac.kr](mailto:yrlee@yu.ac.kr), Phone: +82-53-810-2529; Fax: +82-53-810-4631

#### Table of Contents

|                                                                        |               |
|------------------------------------------------------------------------|---------------|
| <b>Spectrophotometric Measurements</b>                                 | <b>S1</b>     |
| <b>References</b>                                                      | <b>S1</b>     |
| <b><sup>1</sup>H NMR and <sup>13</sup>C NMR Spectra of 2-Pyridones</b> | <b>S2-28</b>  |
| <b>X-Ray Structure of Compound 5</b>                                   | <b>S29</b>    |
| <b>X-Ray Data of Compound 5</b>                                        | <b>S28-38</b> |

## Spectrophotometric Measurements

Absorbance spectra of the tested compounds were analyzed at room temperature (298 K) on a UV/vis spectrophotometer (Optizen UV-3200). Tested compounds and oxybenzone (Aldrich, analytical standard,  $\geq 98\%$  pure) were prepared in an ethanol solvent (Sigma-Aldrich,  $\geq 99.8\%$  pure) at a concentration of 50  $\mu\text{M}$ . The data were corrected for solvent background by the instrument's calibration using the solvent as a blank. The absorption spectra of samples in solution were obtained in the range of 200-450 nm (for the measurements and determinations of typical parameters for sun protection materials: UVA/UVB, 290-400) using 1 cm quartz cell, and ethanol as a blank. The absorption data were obtained in the range of 200-450/290-400, every 1 nm, and 3 determinations were made at each point, followed by the data analysis. Critical wavelength is defined as the wavelength  $\lambda_c$  where the area under the spectrum from 290 nm (the approximate lower wavelength limit of terrestrial sunlight) to  $\lambda_c$ , is 90% of the integral of the absorbance spectrum from 290 to 400 nm. Similar to the critical wavelength, the UVA/UVB-ratio is also a reduction of the complete spectral information to one number, characterizing in some way the shape of the spectrum in terms of the amount of UVA-coverage in relation to the amount of UVB-coverage. The *in vitro* SPF is used for rating the protection strength of sun protection materials.<sup>S1</sup>

## References

- S1. (a) E. A. Dutra, D. A. Goncalves da Costa e Oliveira, E. R. M. Kedor-Hackmann and M. I. R. M. Santoro, *Rev. Bras. Cienc. Farm.*, 2004, **40**, 381; (b) J. Akerman, L. Kubac, H. Bendova, D. Jirova and K. Kejllova, *Int. J. Cosmet. Sci.*, 2009, **31**, 119; (c) A. P. Schuch, M. C. S. Moraes, T. Yagura and C. F. M. Menck, *Environ. Sci. Technol.*, 2014, **48**, 11584.

# <sup>1</sup>H NMR and <sup>13</sup>C NMR Spectra of 2-Pyridones

Compound-4a

<sup>1</sup>H-NMR/DMSO-d<sub>6</sub>

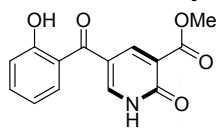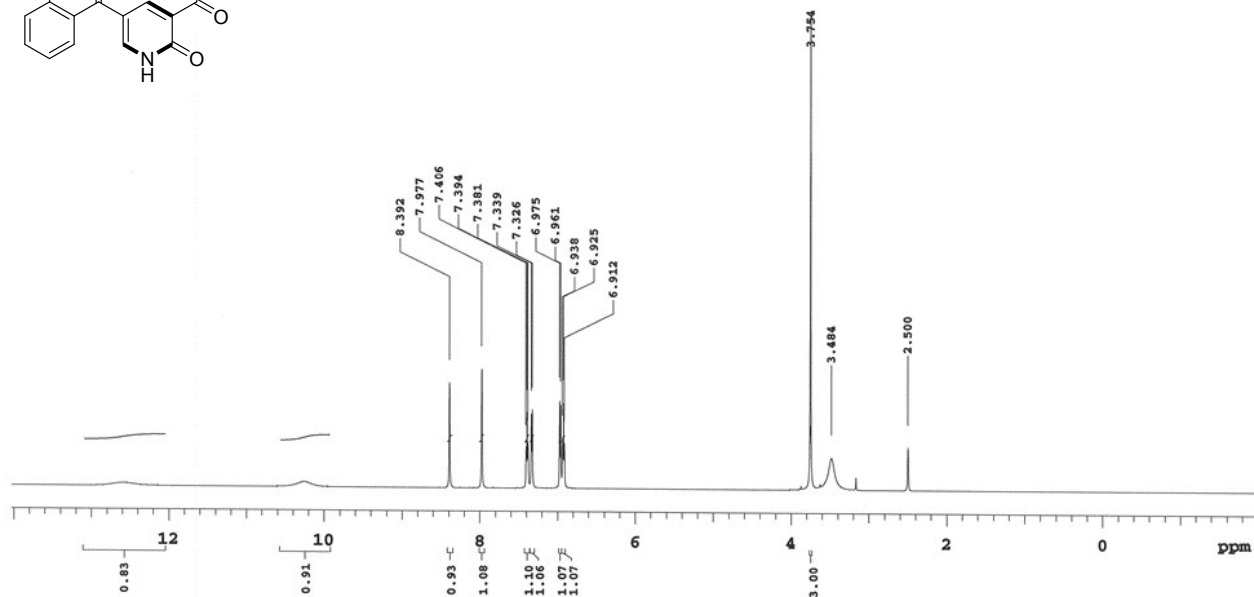

Compound-4a

<sup>13</sup>C-NMR/DMSO-d<sub>6</sub>

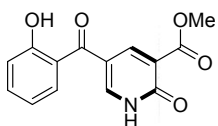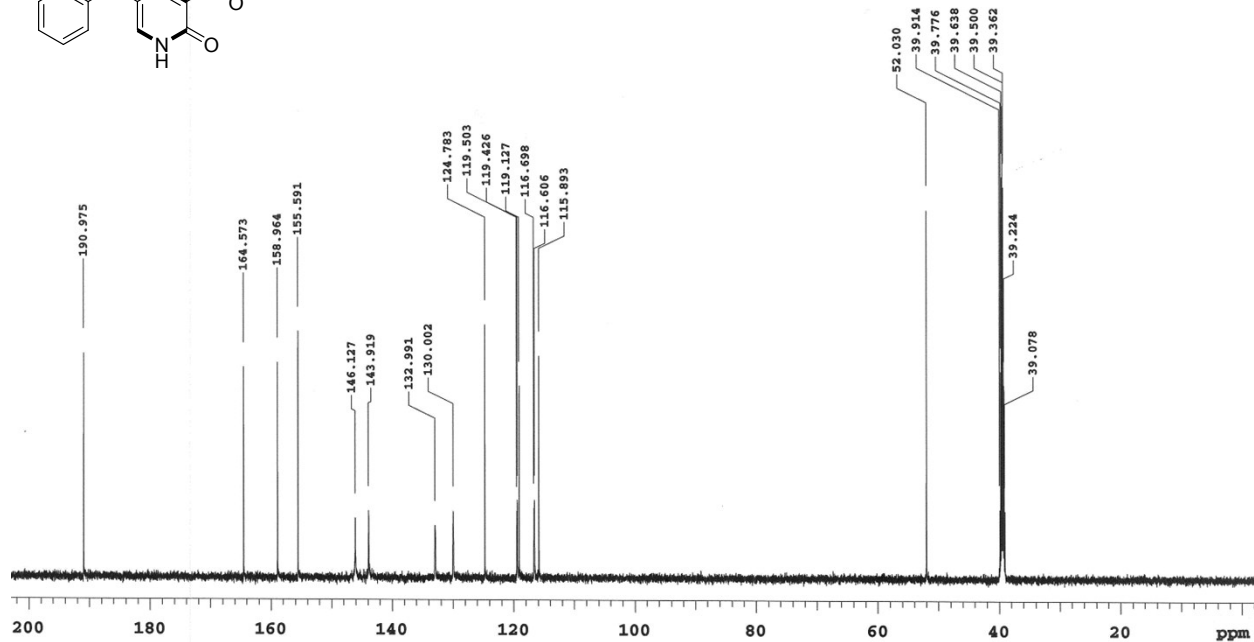

Compound-4b

<sup>1</sup>H-NMR/DMSO-d<sub>6</sub>

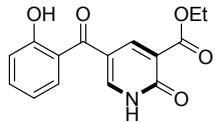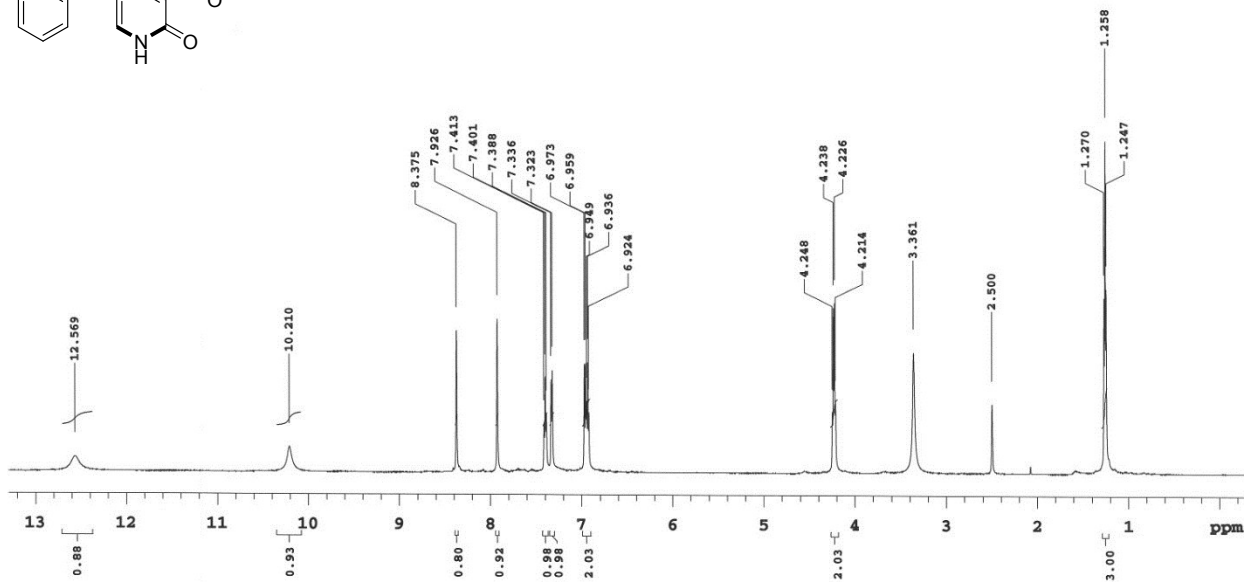

Compound-4b

<sup>13</sup>C-NMR/DMSO-d<sub>6</sub>

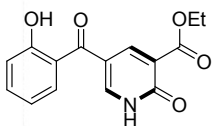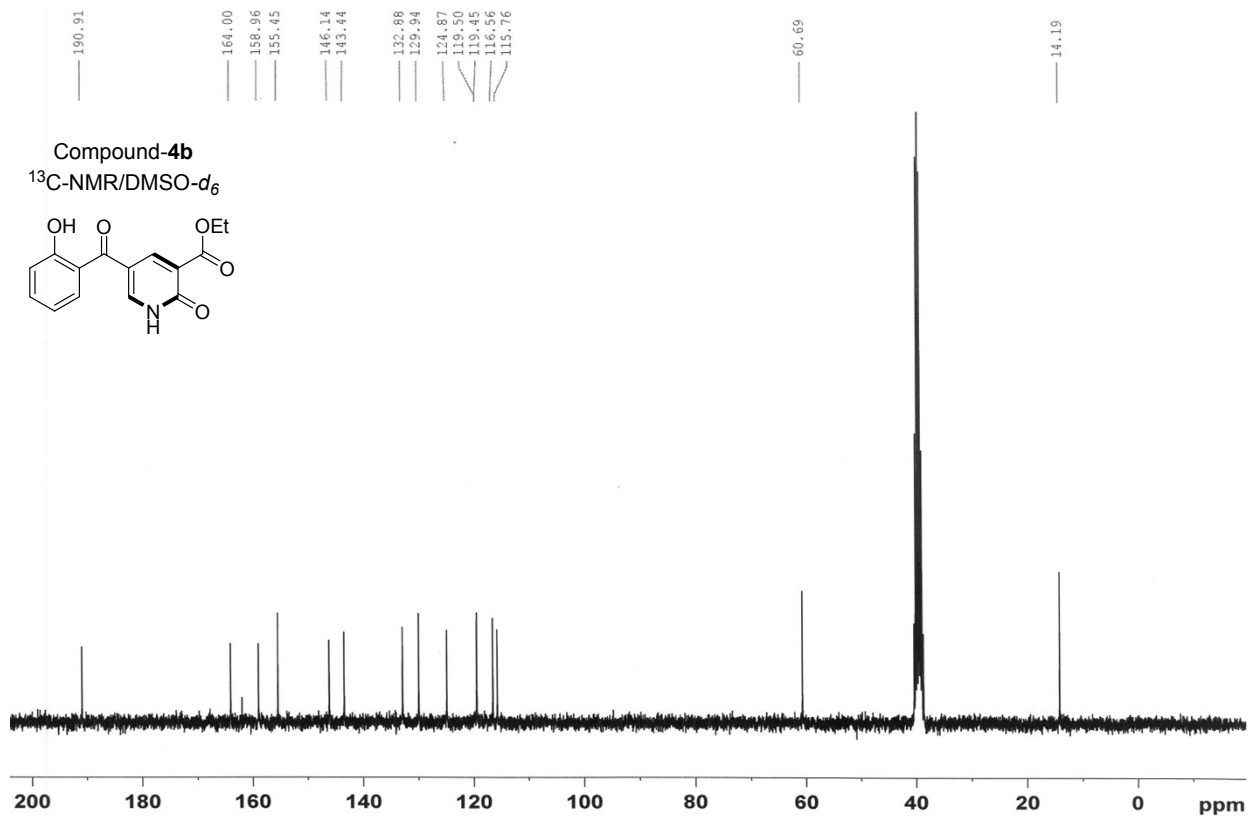

Compound-4c

<sup>1</sup>H-NMR/DMSO-d<sub>6</sub>

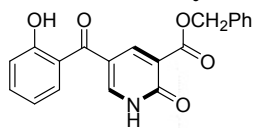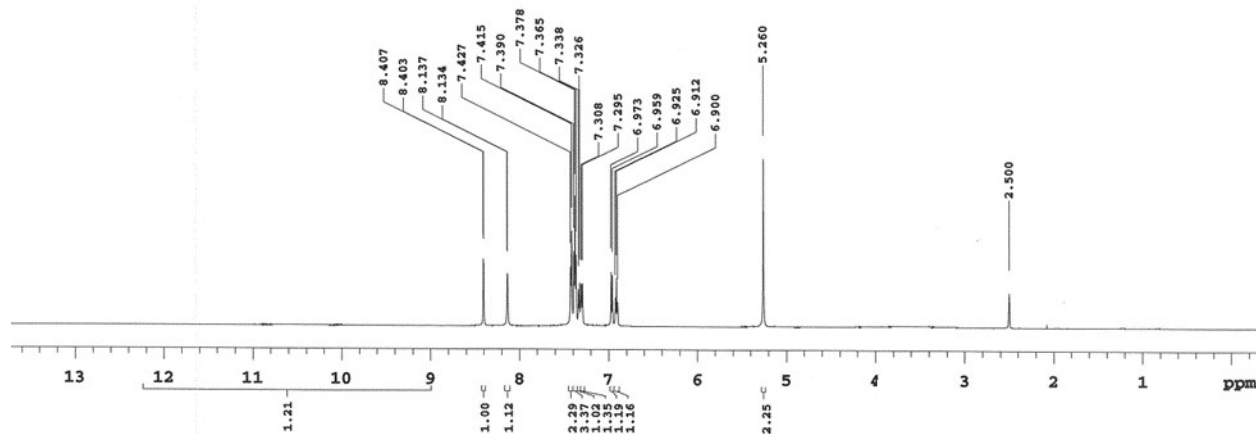

Compound-4c

<sup>13</sup>C-NMR/DMSO-d<sub>6</sub>

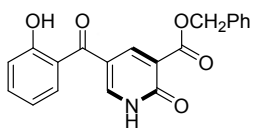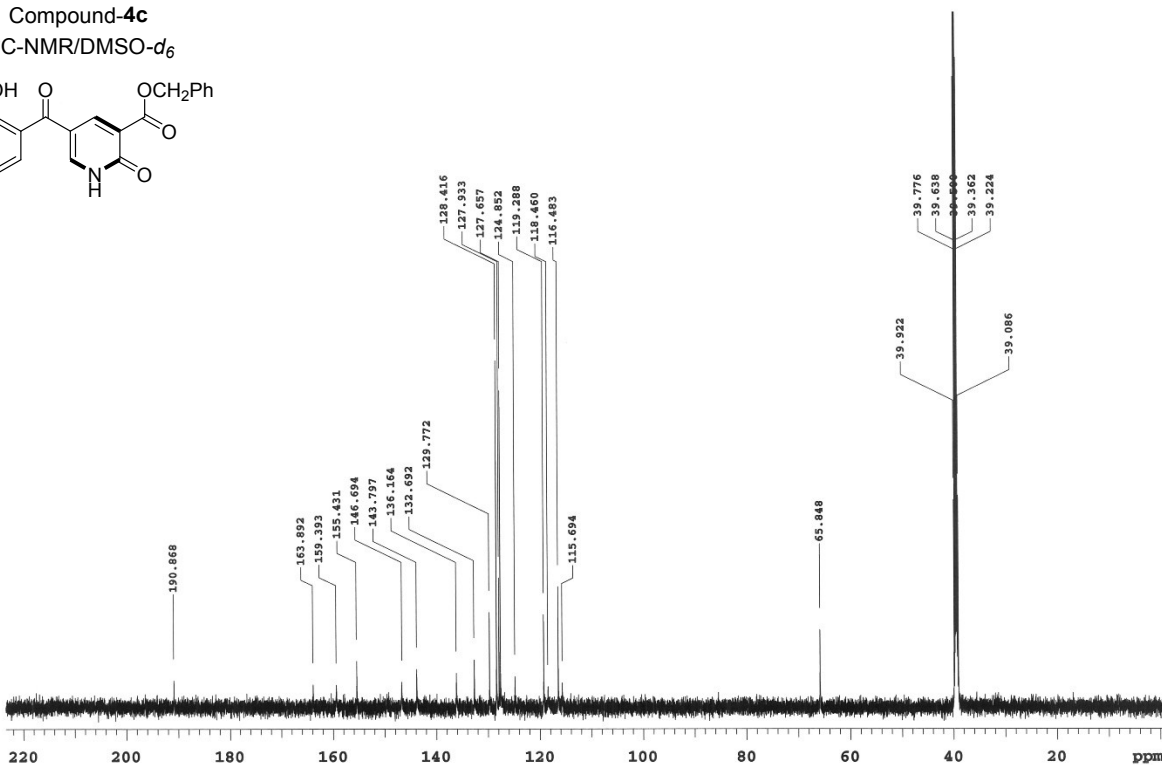

Compound-4d

<sup>1</sup>H-NMR/DMSO-d<sub>6</sub>

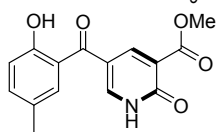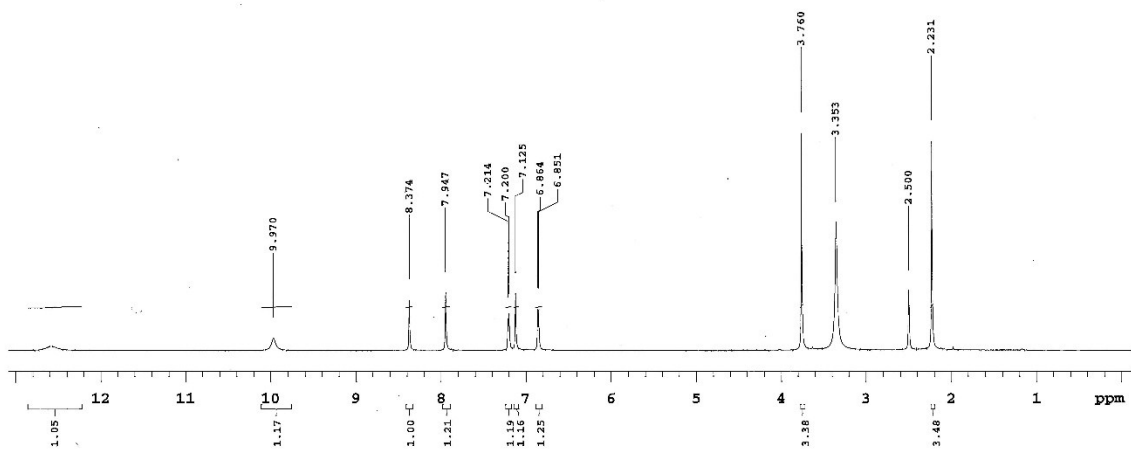

Compound-4d

<sup>13</sup>C-NMR/DMSO-d<sub>6</sub>

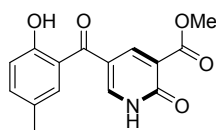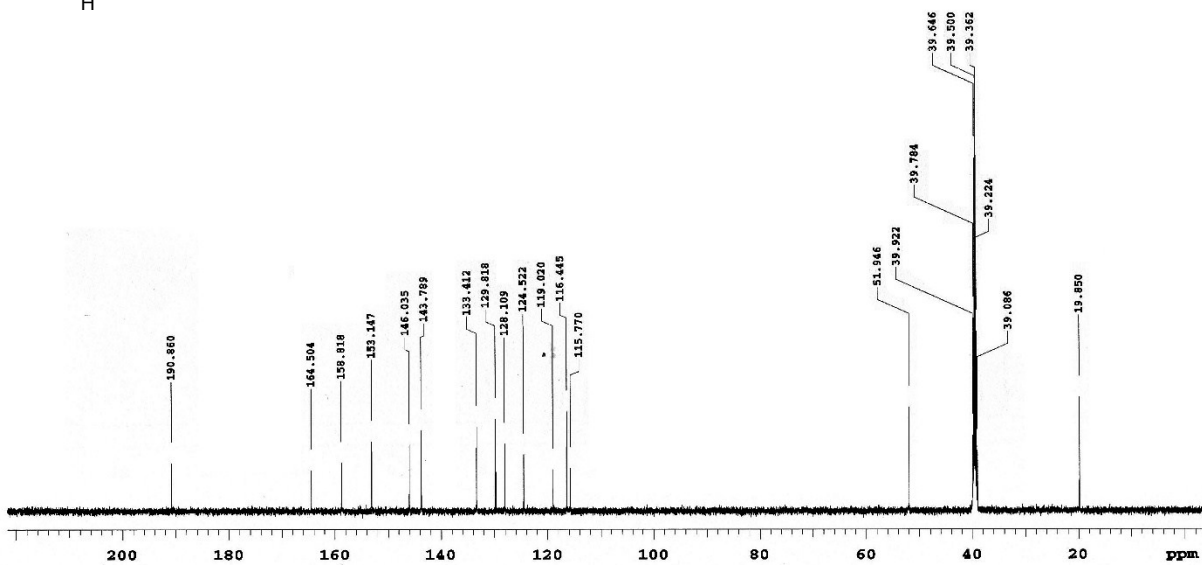

Compound-4e

<sup>1</sup>H-NMR/DMSO-d<sub>6</sub>

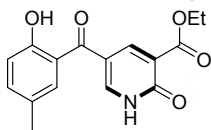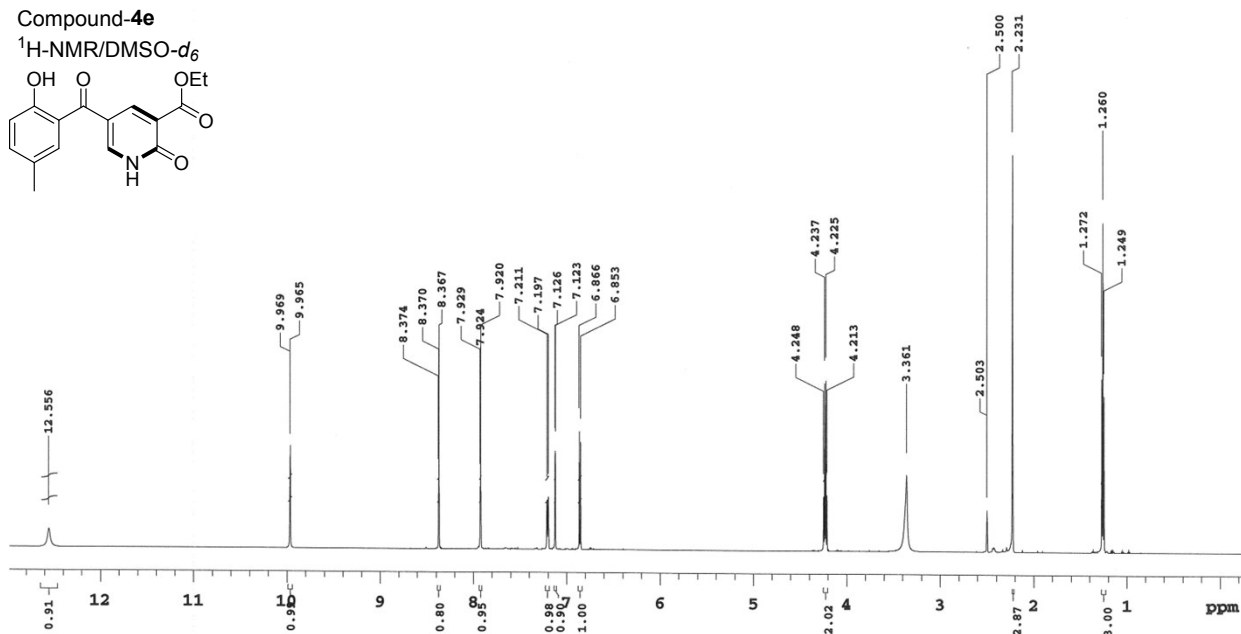

Compound-4e

<sup>13</sup>C-NMR/DMSO-d<sub>6</sub>

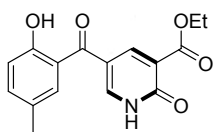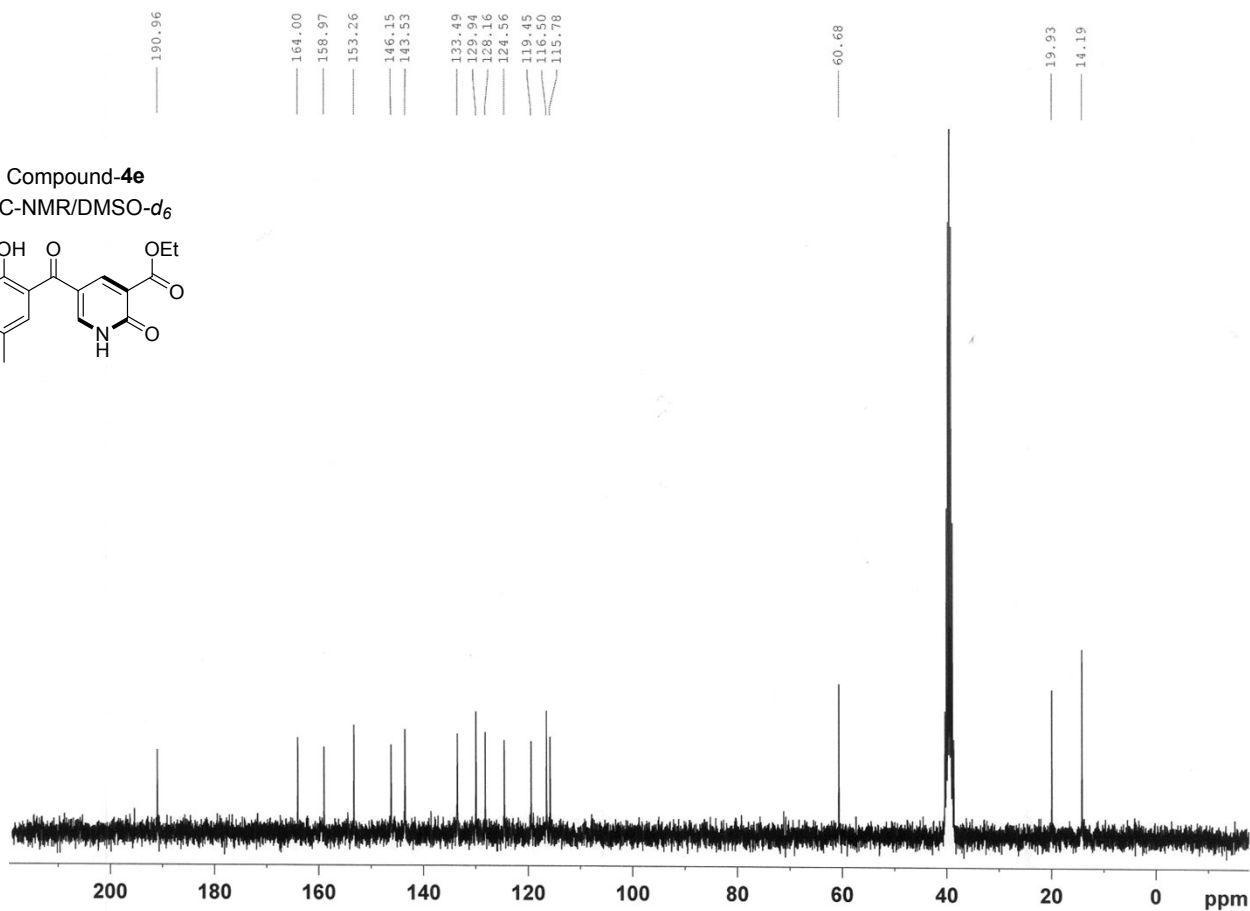

Compound-4f  
<sup>1</sup>H-NMR/CDCl<sub>3</sub>

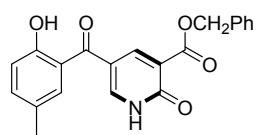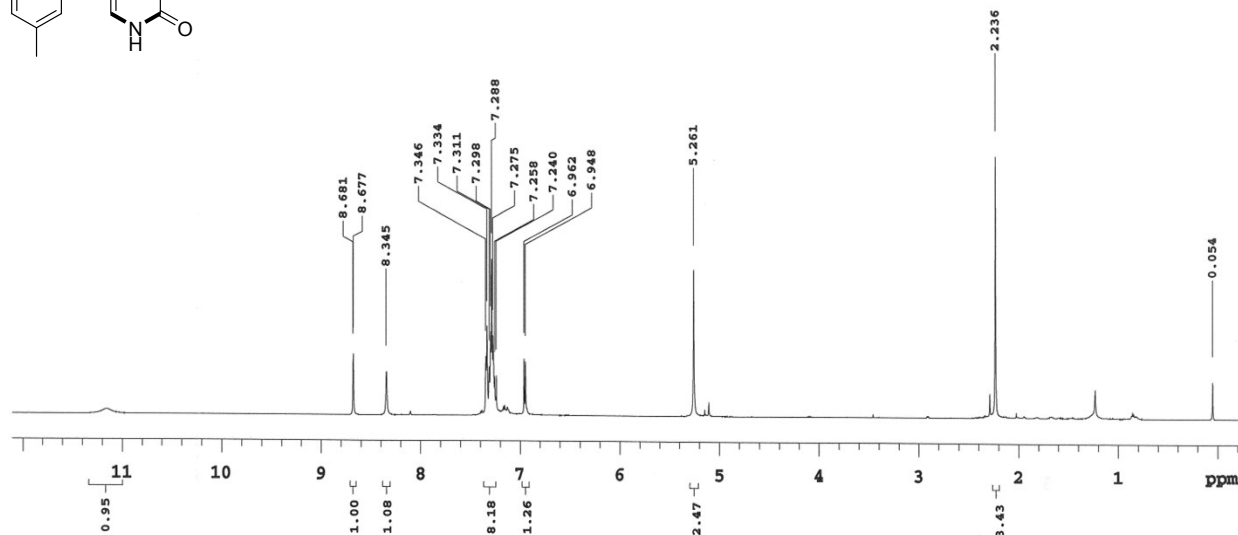

Compound-4f  
<sup>13</sup>C-NMR/DMSO-*d*<sub>6</sub>

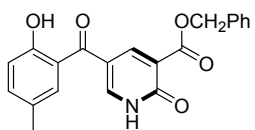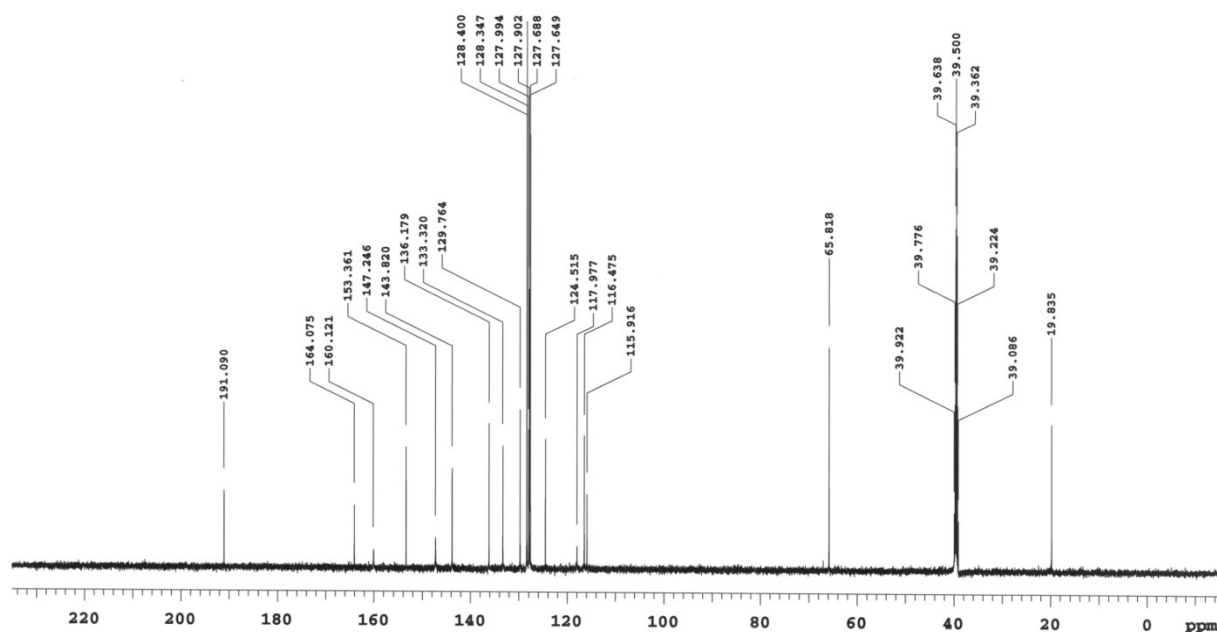



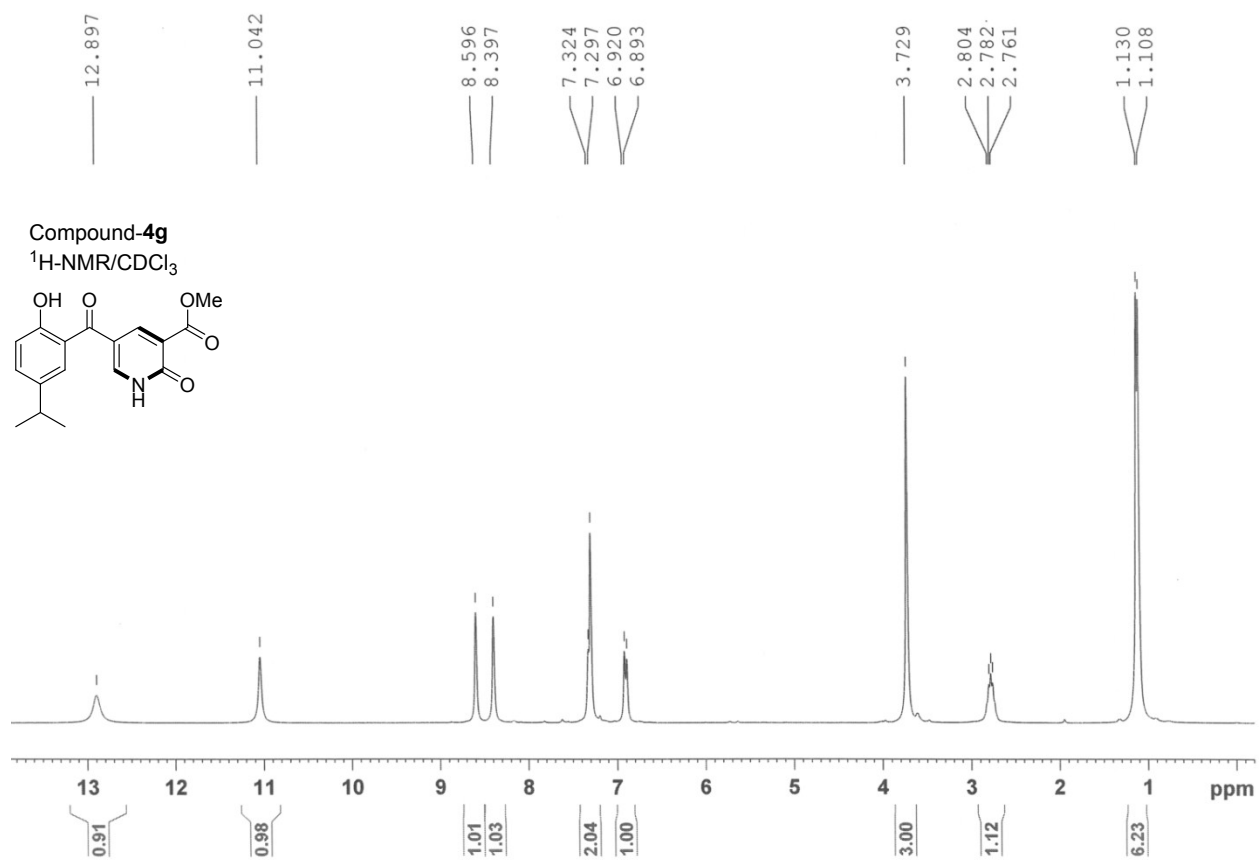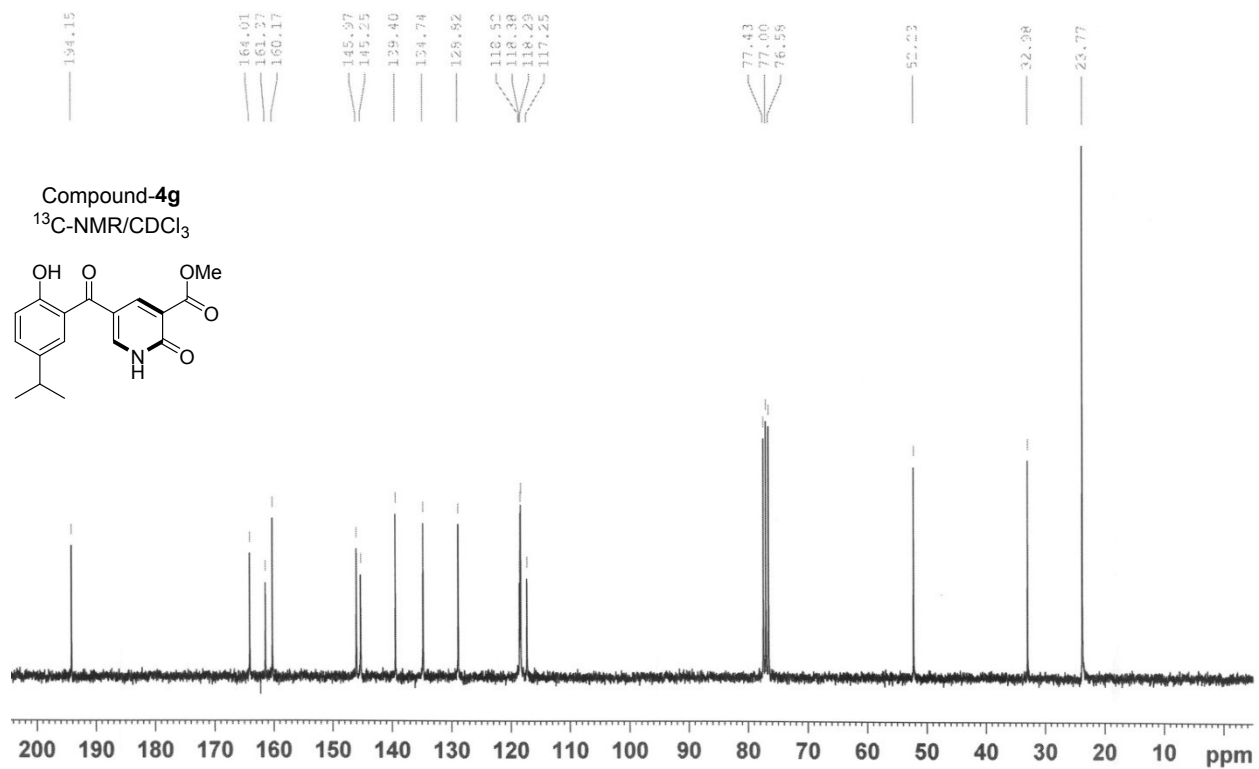

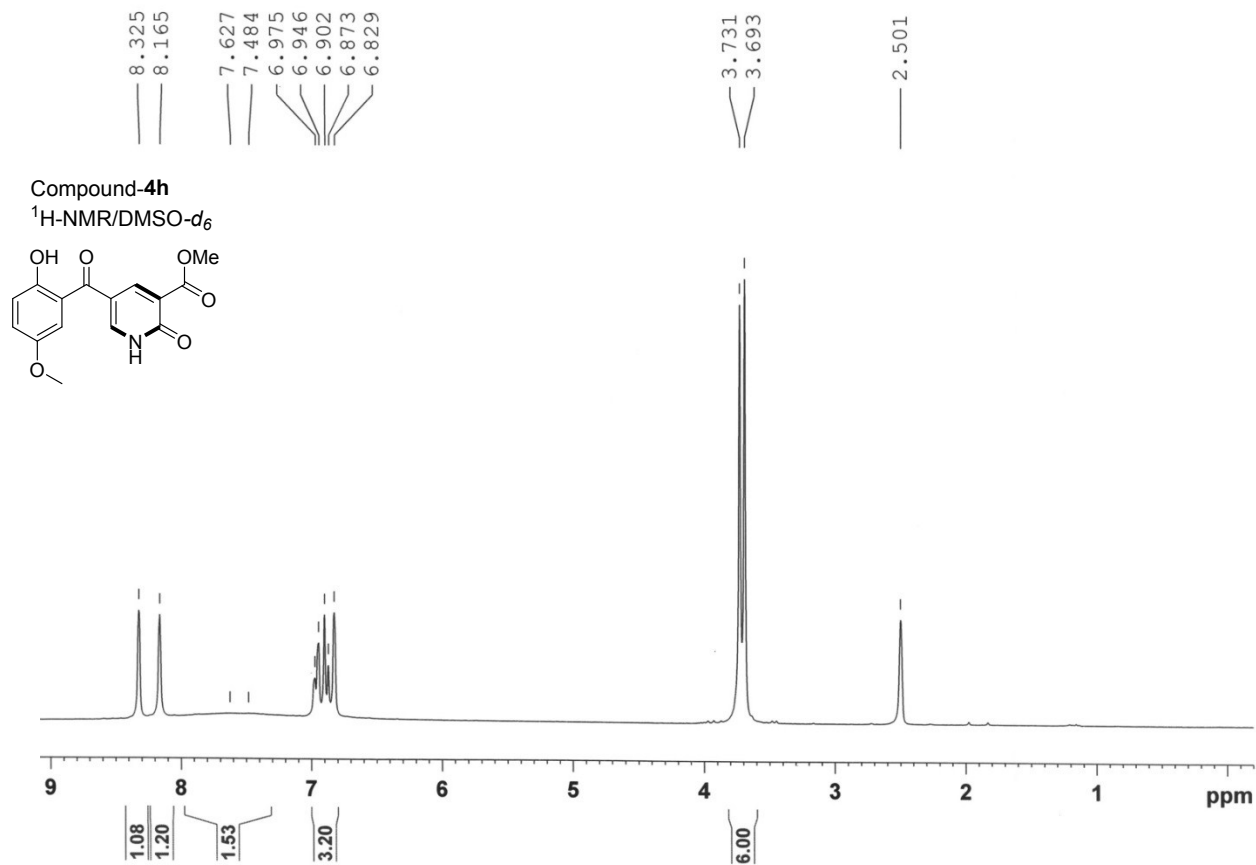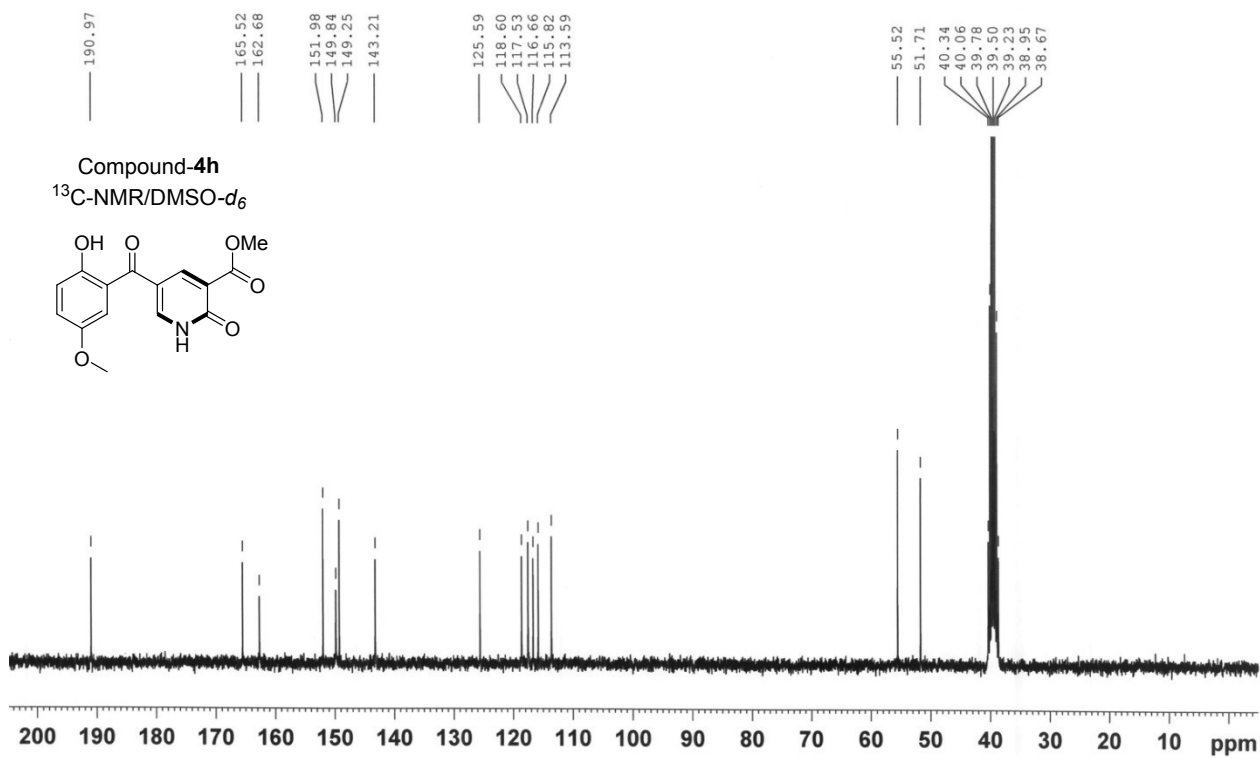

Compound-4i  
<sup>1</sup>H-NMR/DMSO-d<sub>6</sub>

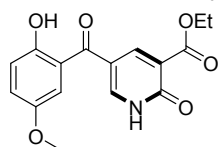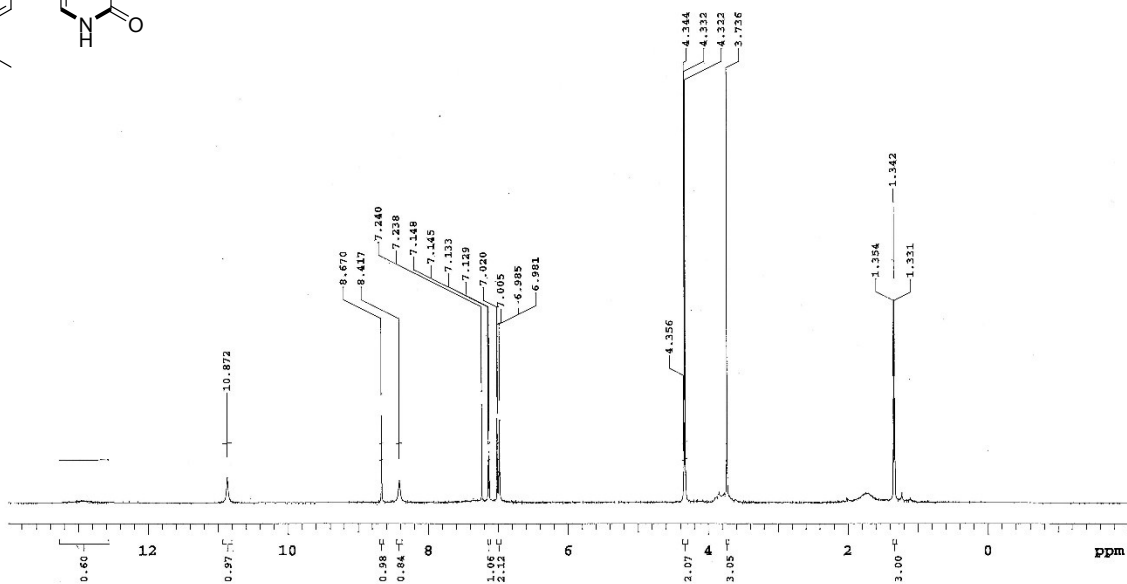

Compound-4i  
<sup>13</sup>C-NMR/DMSO-d<sub>6</sub>

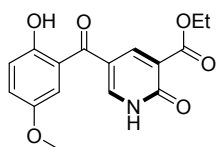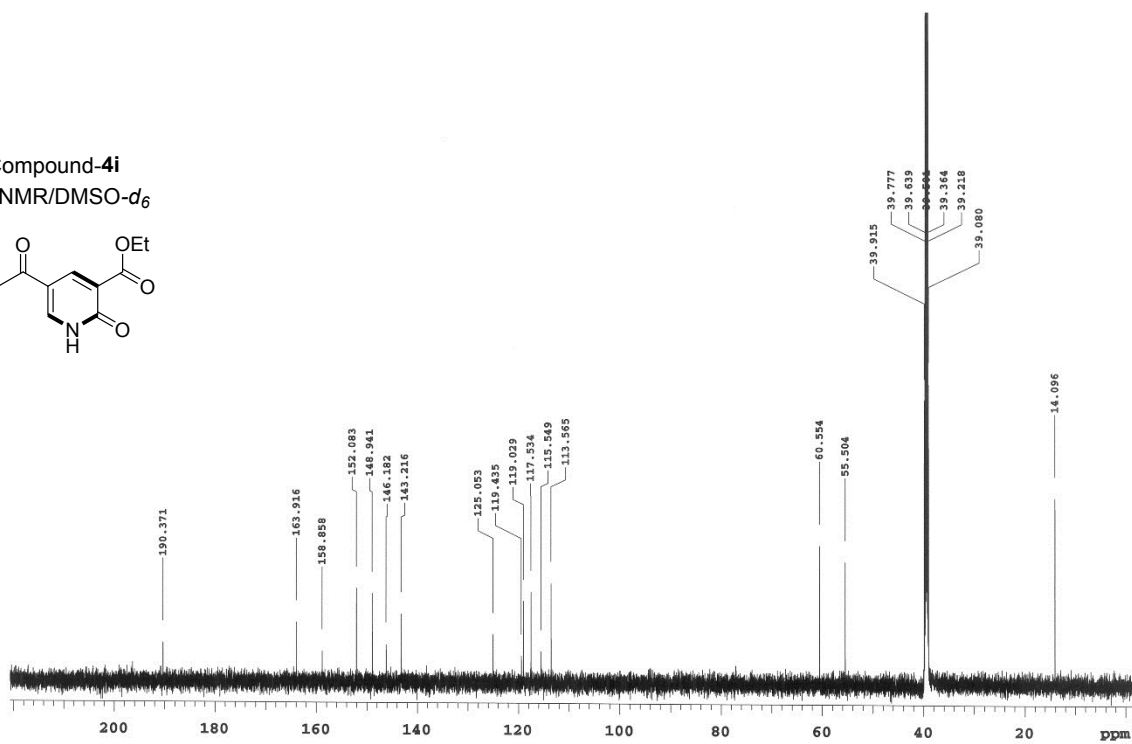

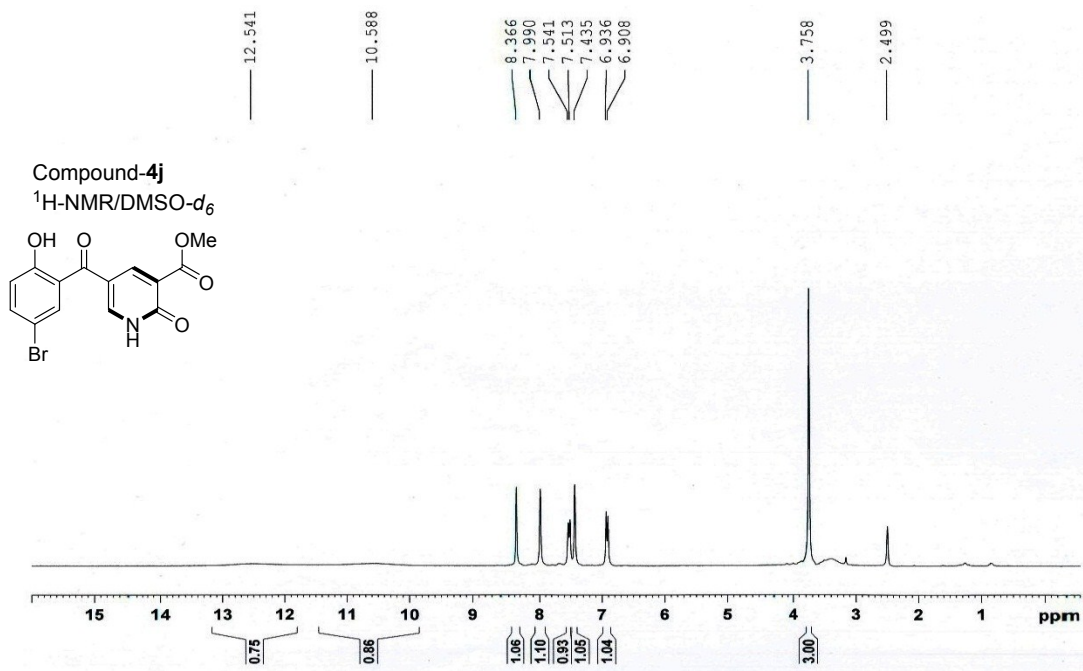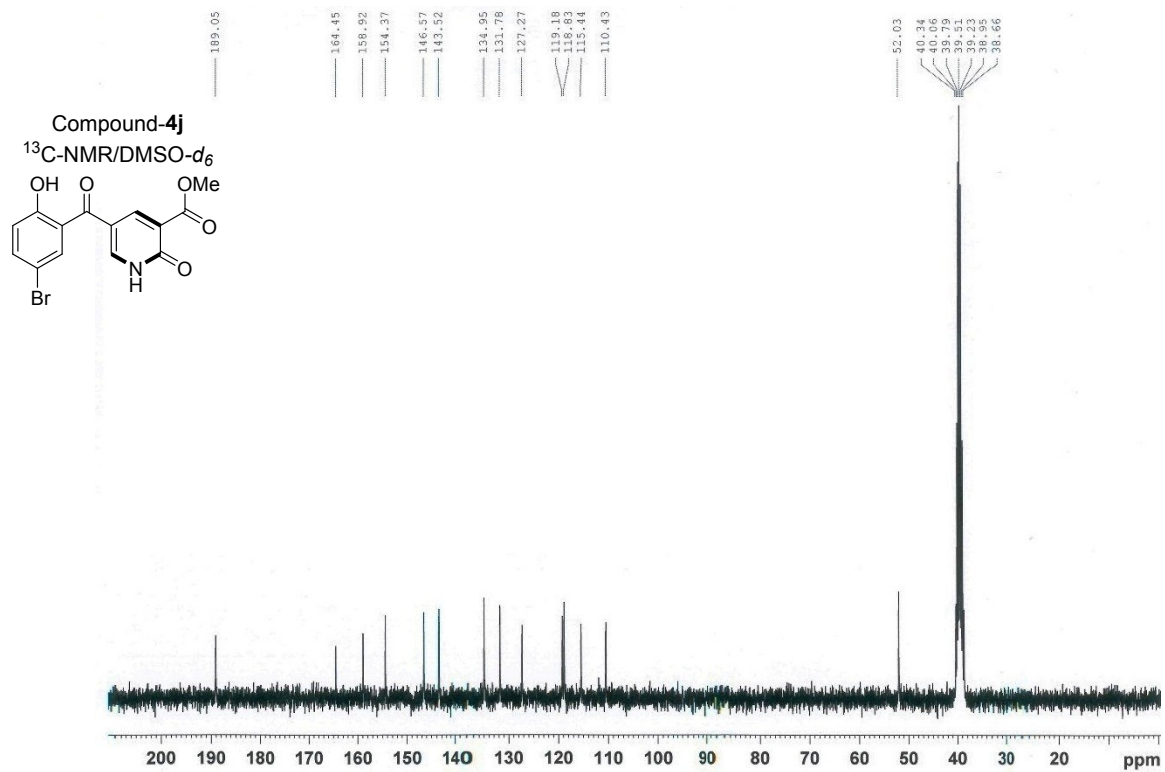

Compound-4k  
<sup>1</sup>H-NMR/DMSO-d<sub>6</sub>

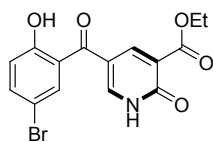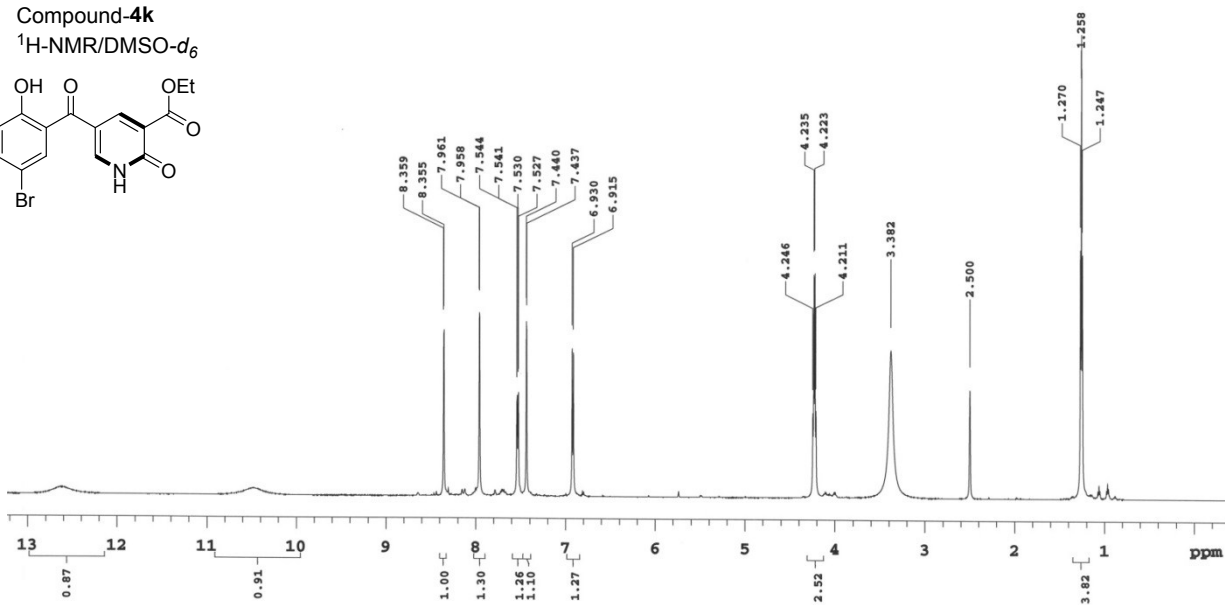

Compound-4k  
<sup>13</sup>C-NMR/DMSO-d<sub>6</sub>

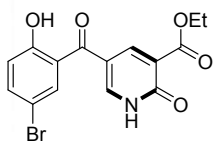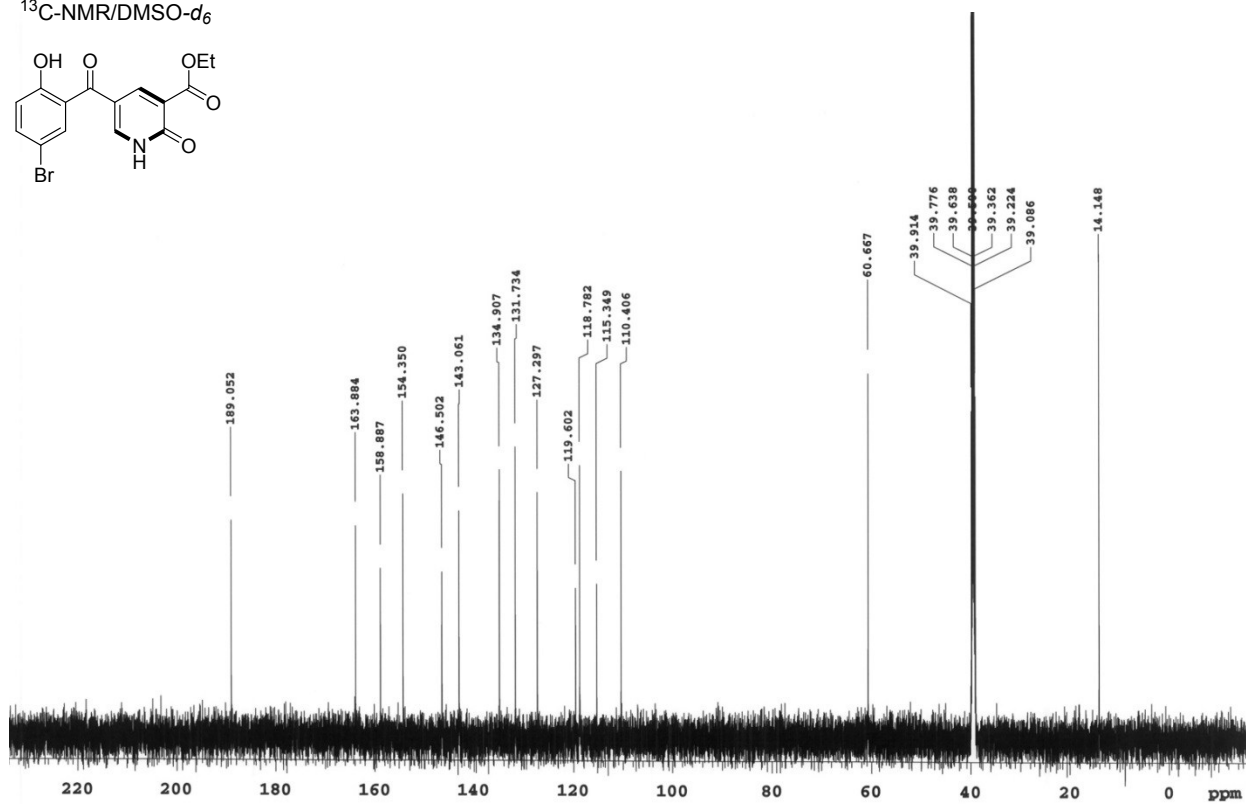

Compound-4I  
<sup>1</sup>H-NMR/DMSO-d<sub>6</sub>

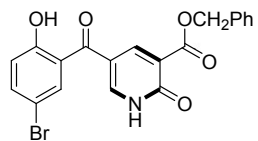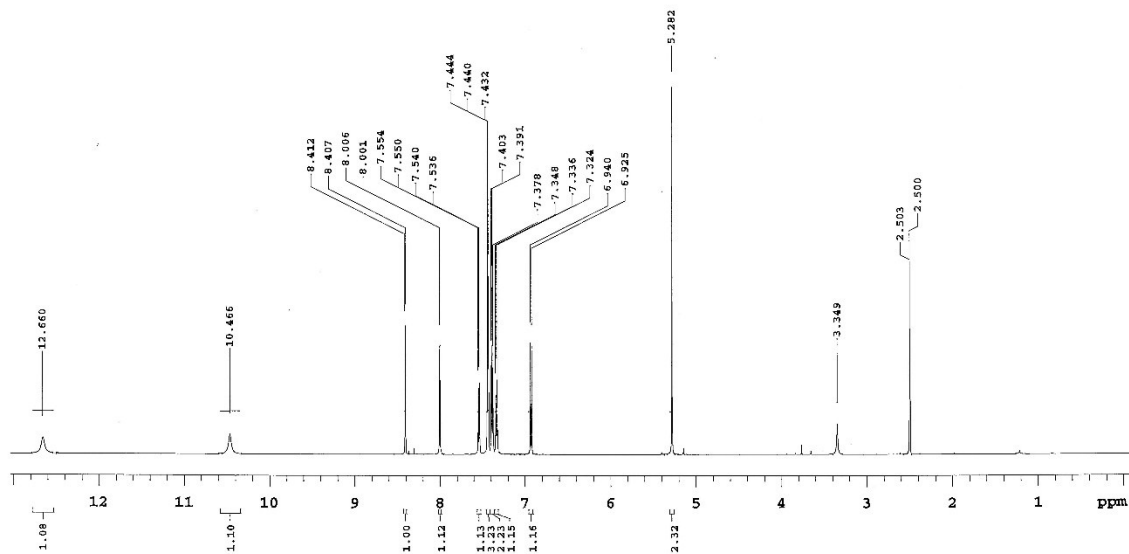

Compound-4I  
<sup>13</sup>C-NMR/DMSO-d<sub>6</sub>

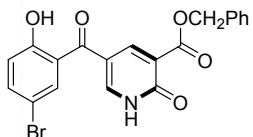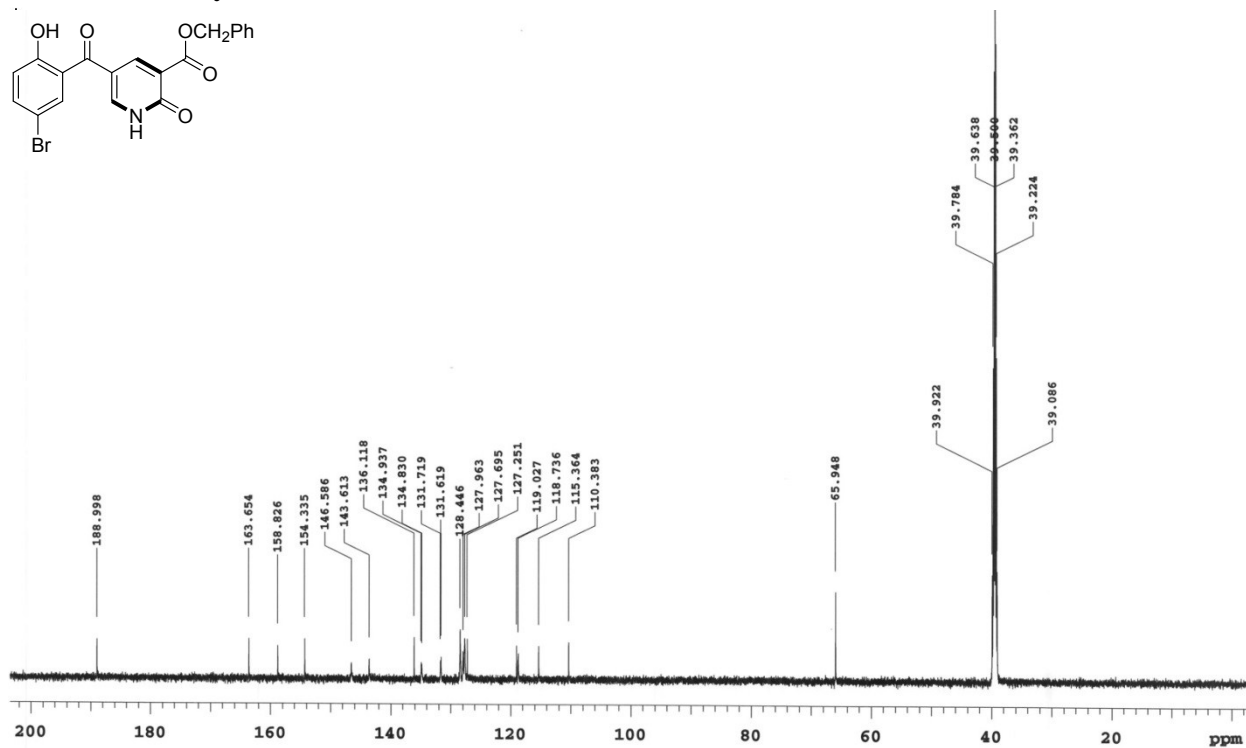

Compound-4m  
<sup>1</sup>H-NMR/DMSO-d<sub>6</sub>

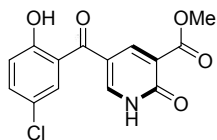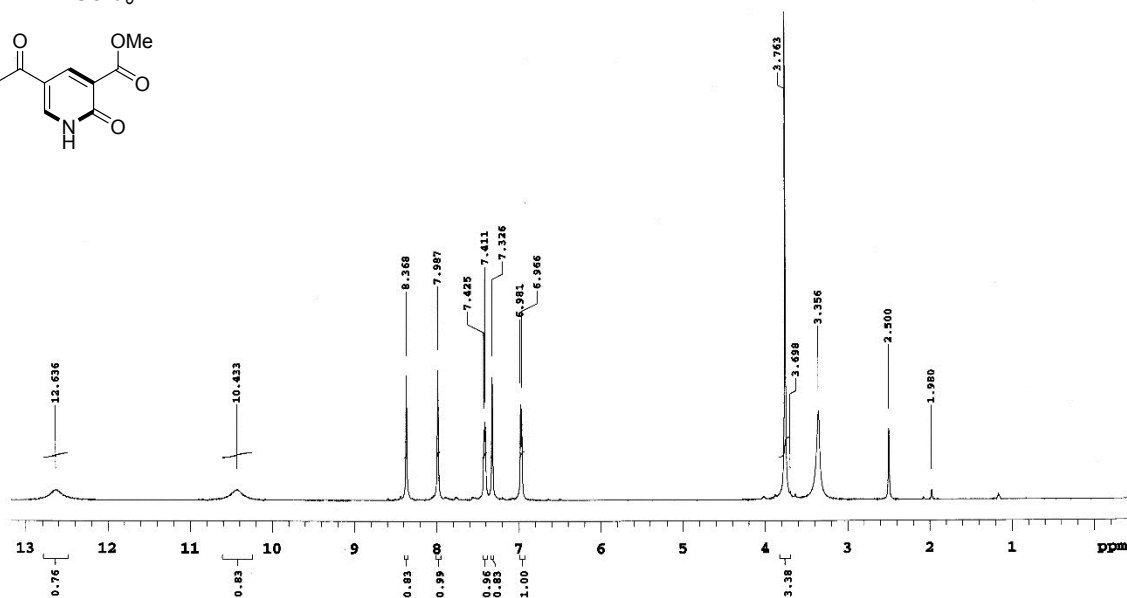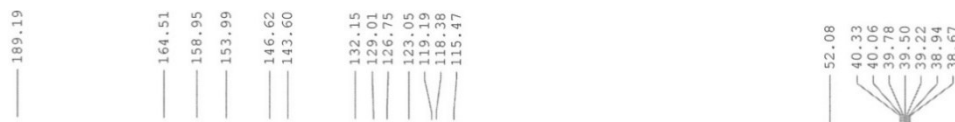

Compound-4m  
<sup>13</sup>C-NMR/DMSO-d<sub>6</sub>

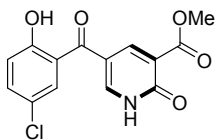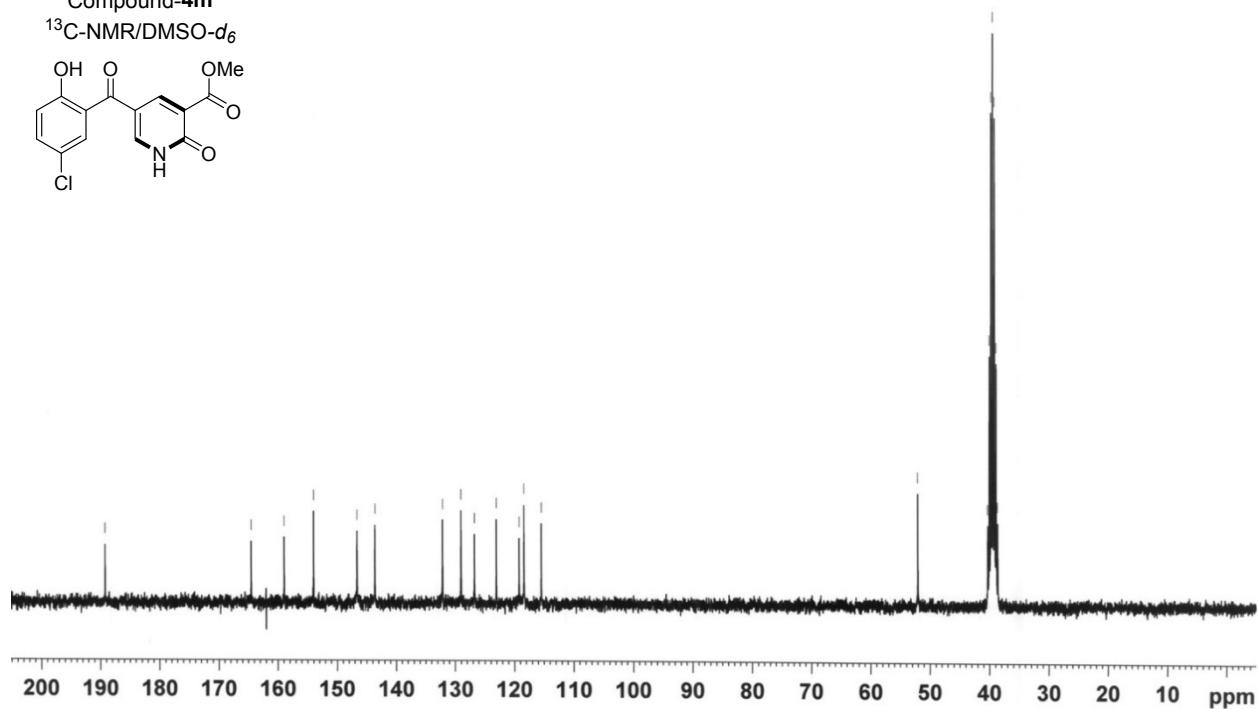

Compound-4n  
<sup>1</sup>H-NMR/DMSO-d<sub>6</sub>

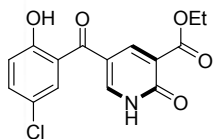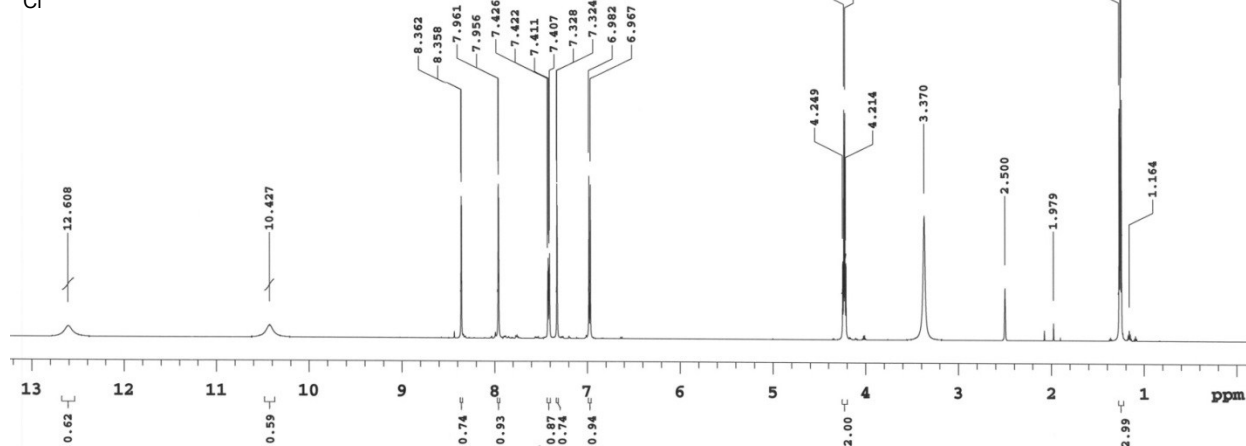

Compound-4n  
<sup>13</sup>C-NMR/DMSO-d<sub>6</sub>

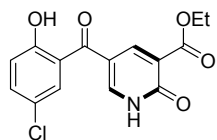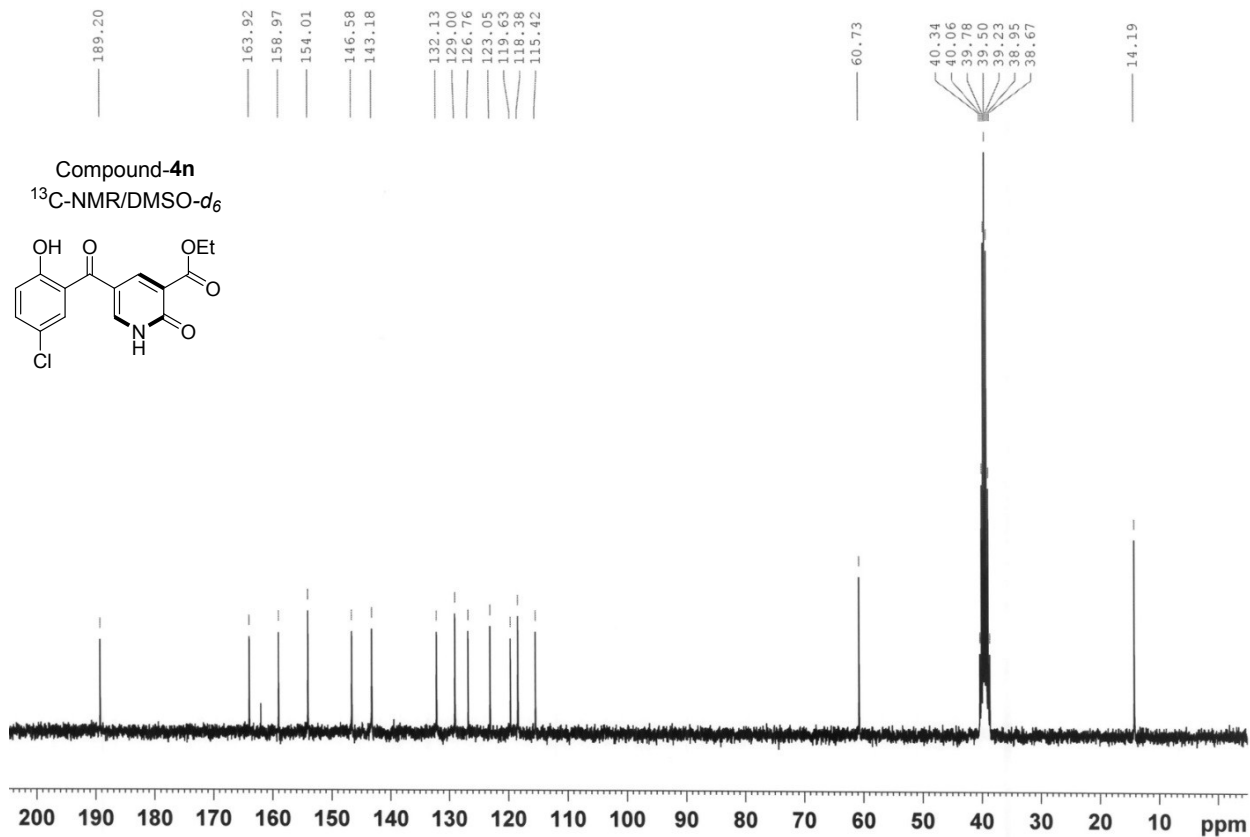



Compound **4o**  
<sup>1</sup>H-NMR/DMSO-*d*<sub>6</sub>

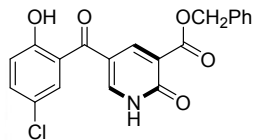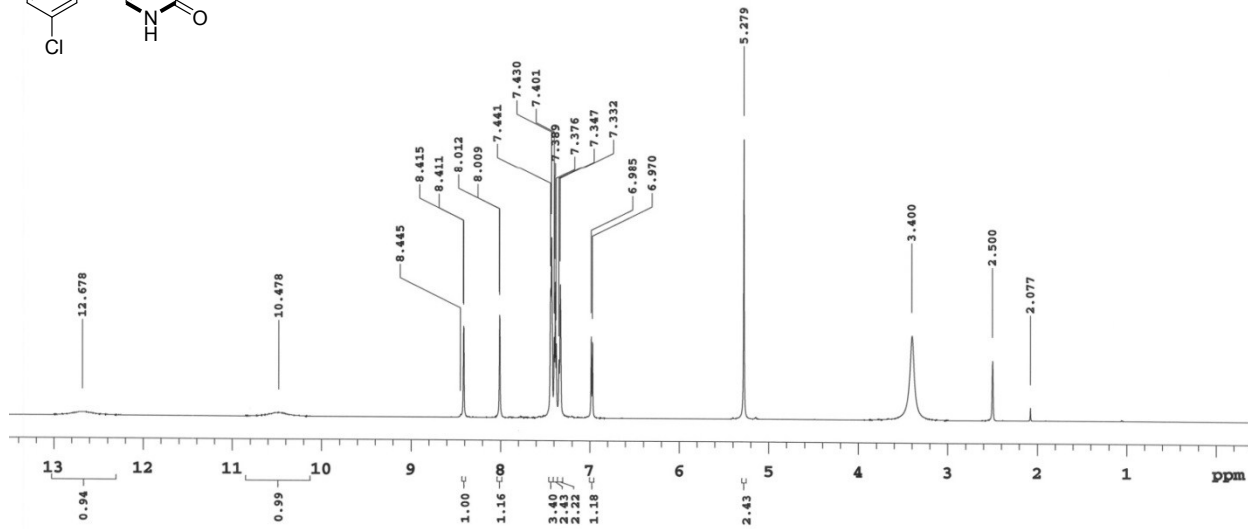

Compound **4o**  
<sup>13</sup>C-NMR/DMSO-*d*<sub>6</sub>

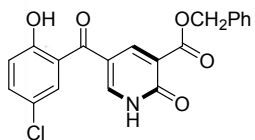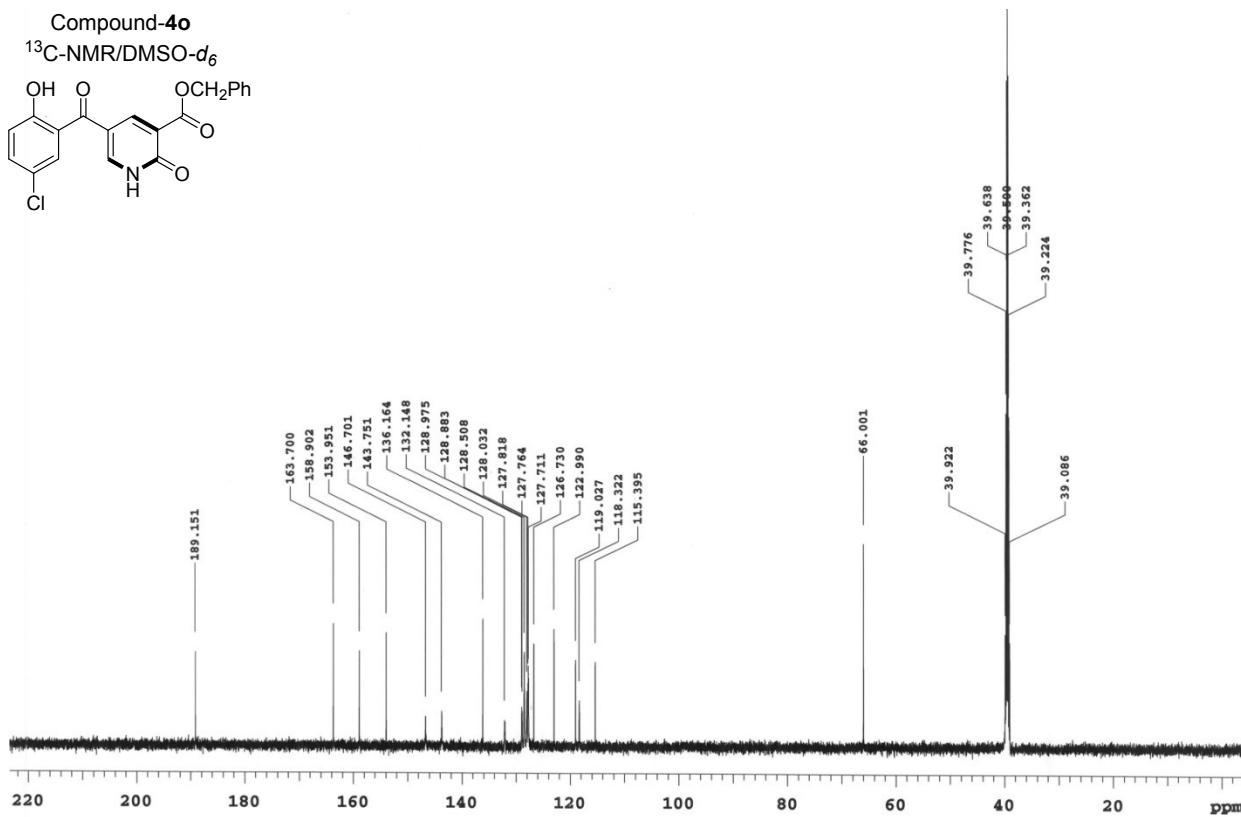

Compound-4p  
<sup>1</sup>H-NMR/DMSO-d<sub>6</sub>

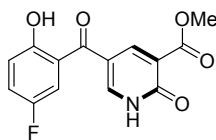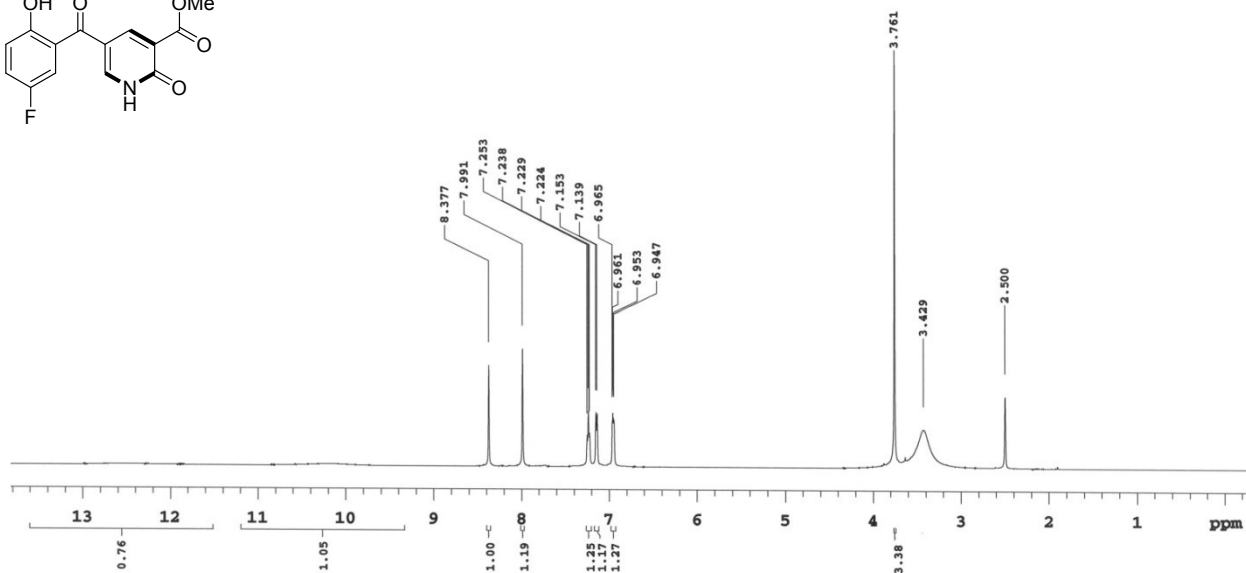

Compound-4p  
<sup>13</sup>C-NMR/DMSO-d<sub>6</sub>

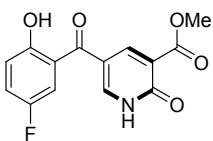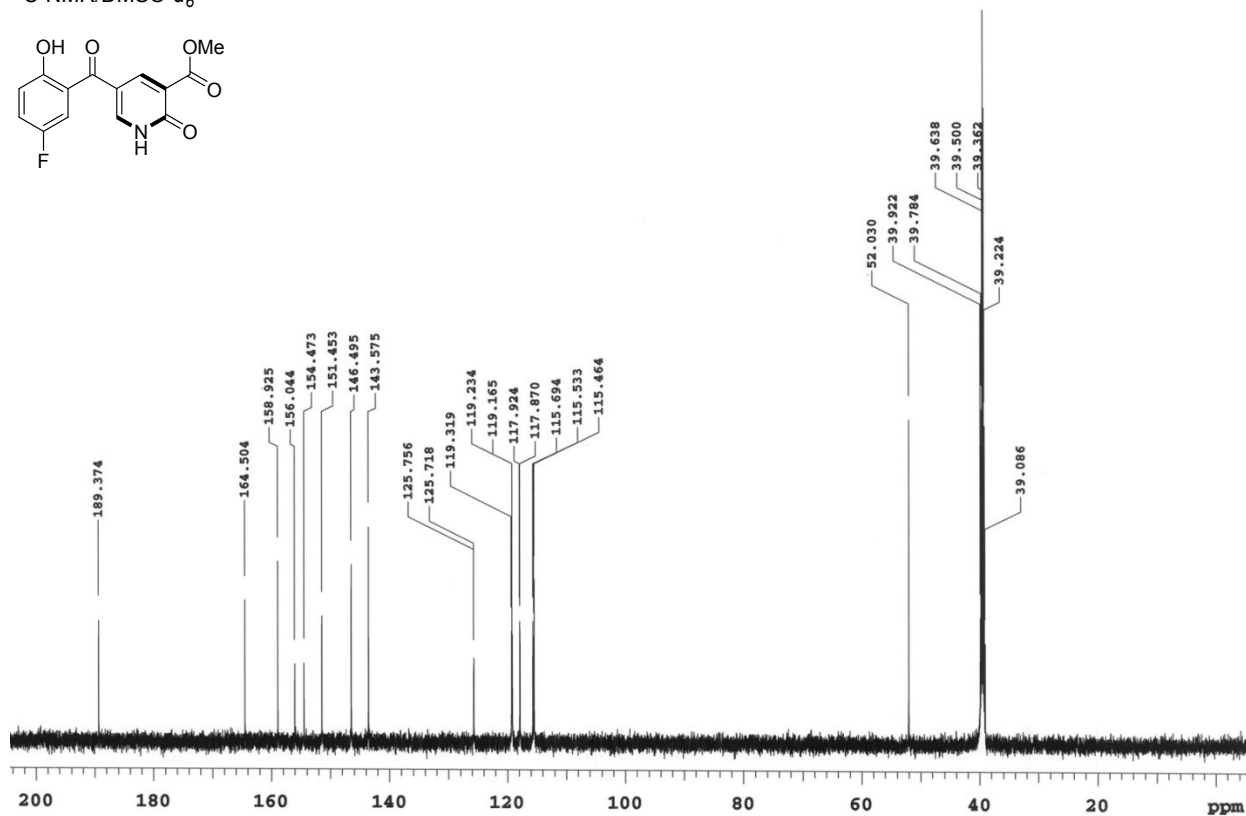

Compound-4q  
<sup>1</sup>H-NMR/DMSO-d<sub>6</sub>

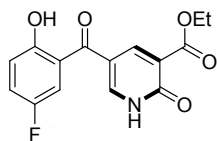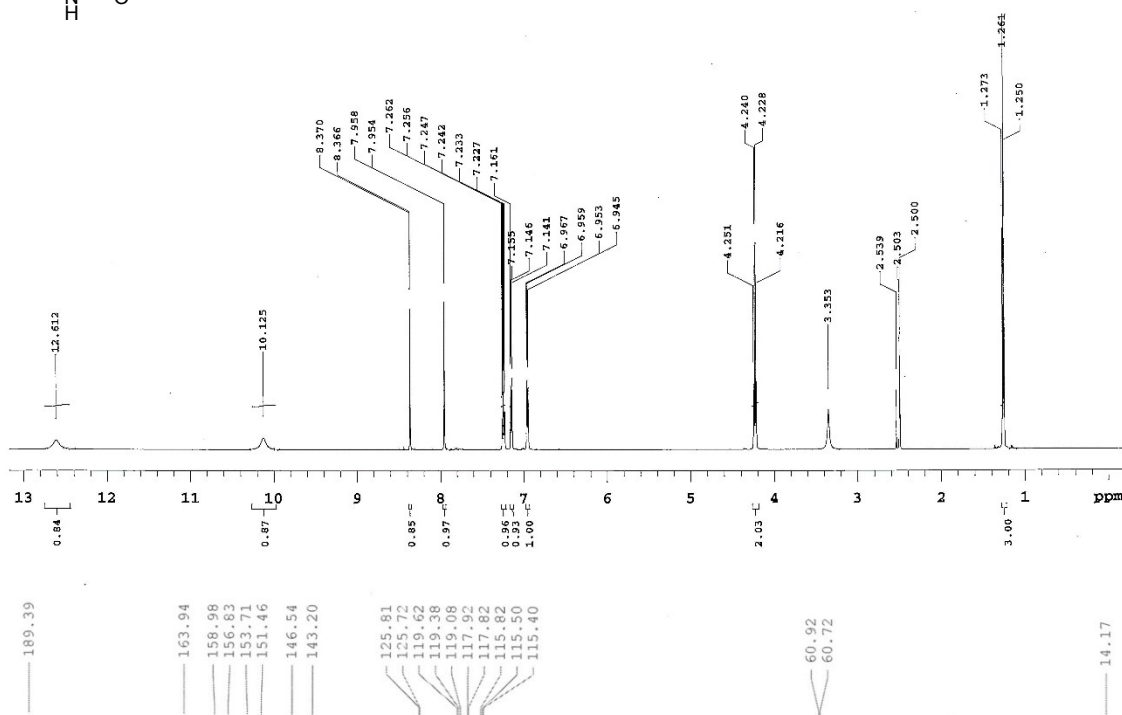

Compound-4q  
<sup>13</sup>C-NMR/DMSO-d<sub>6</sub>

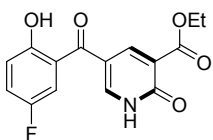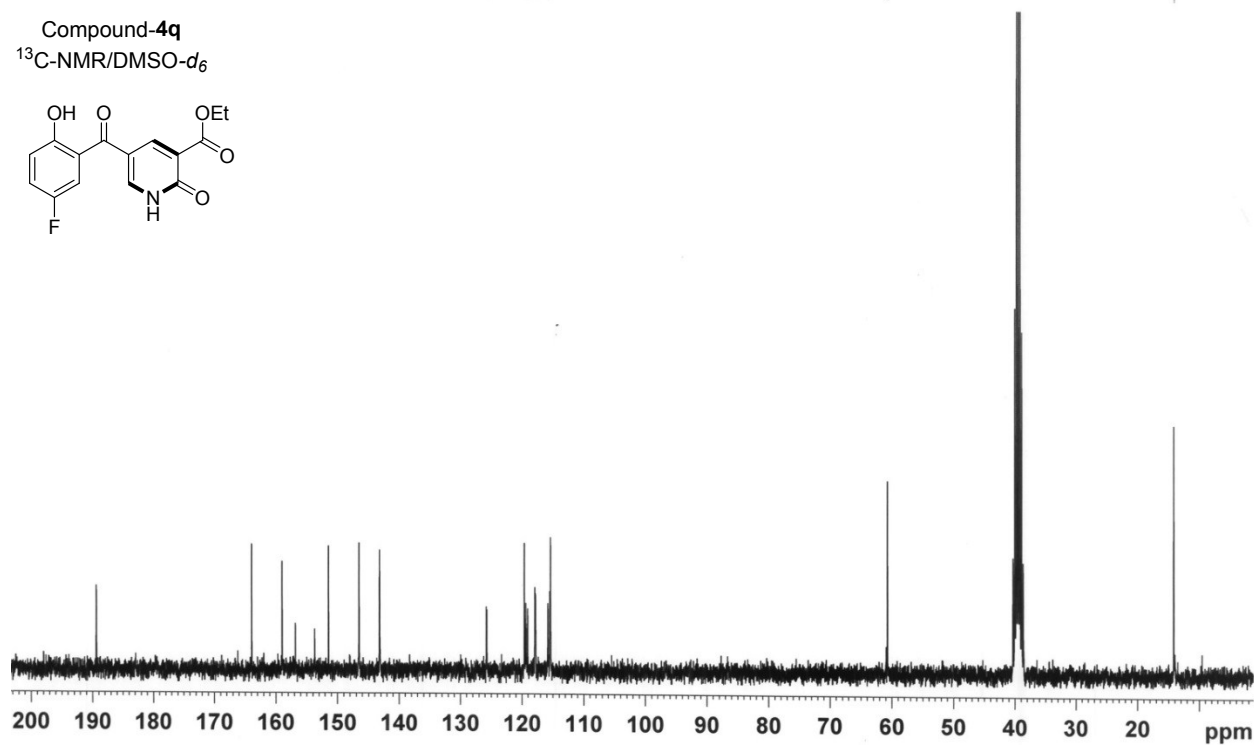

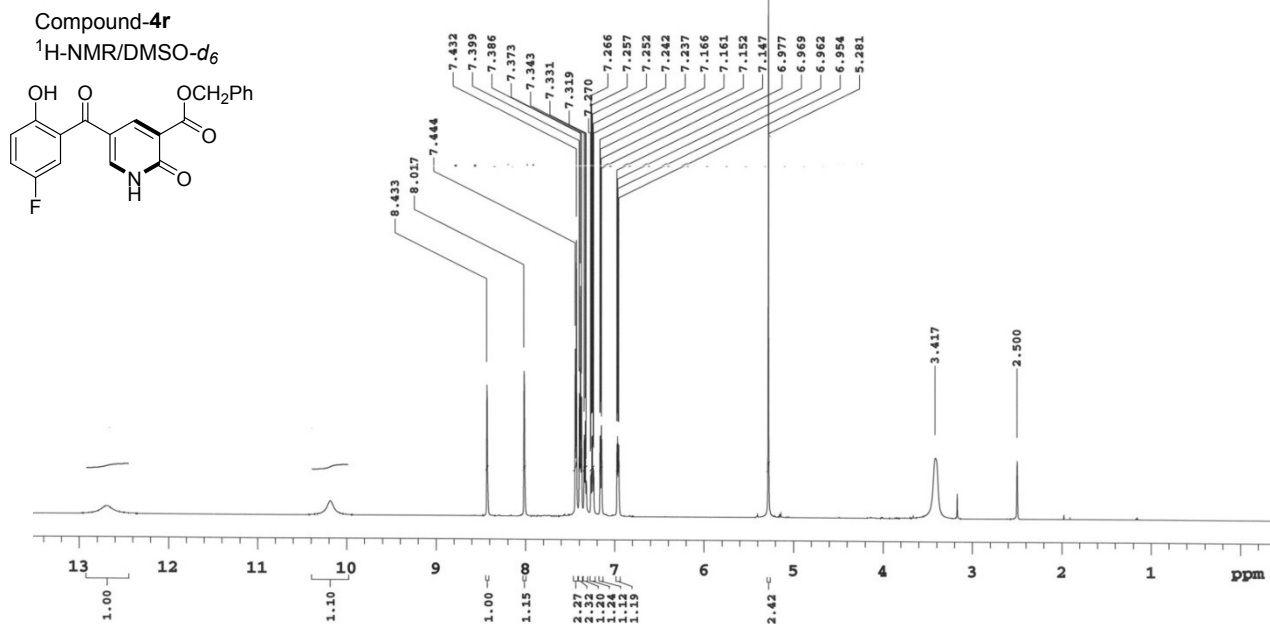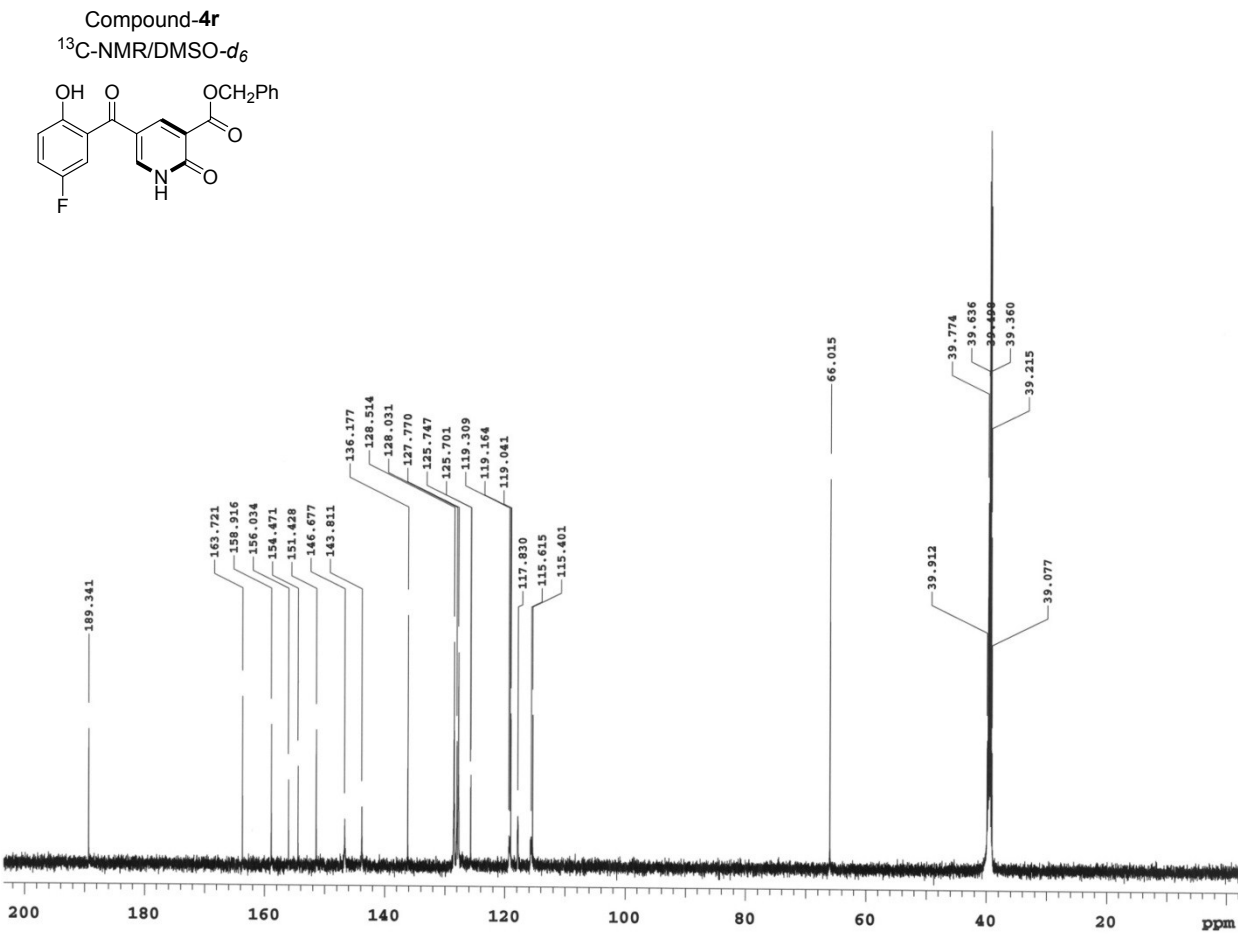

Compound-4s  
<sup>1</sup>H-NMR/DMSO-d<sub>6</sub>

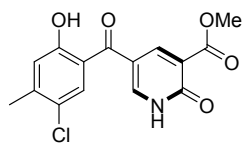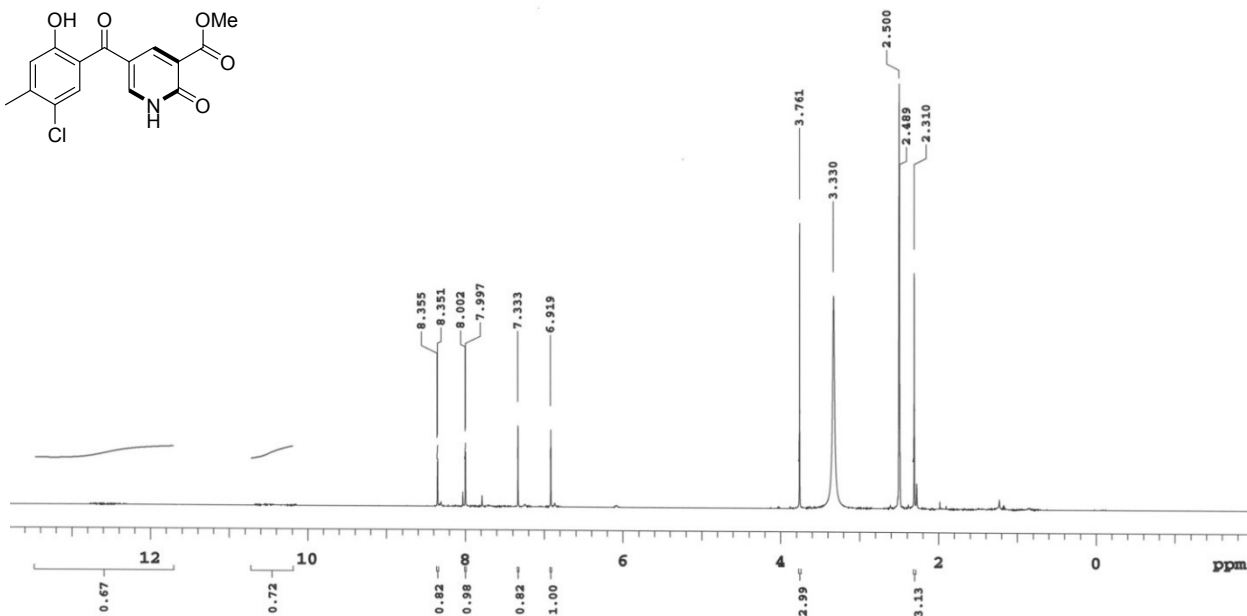

Compound-4s  
<sup>13</sup>C-NMR/DMSO-d<sub>6</sub>

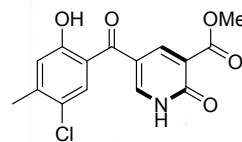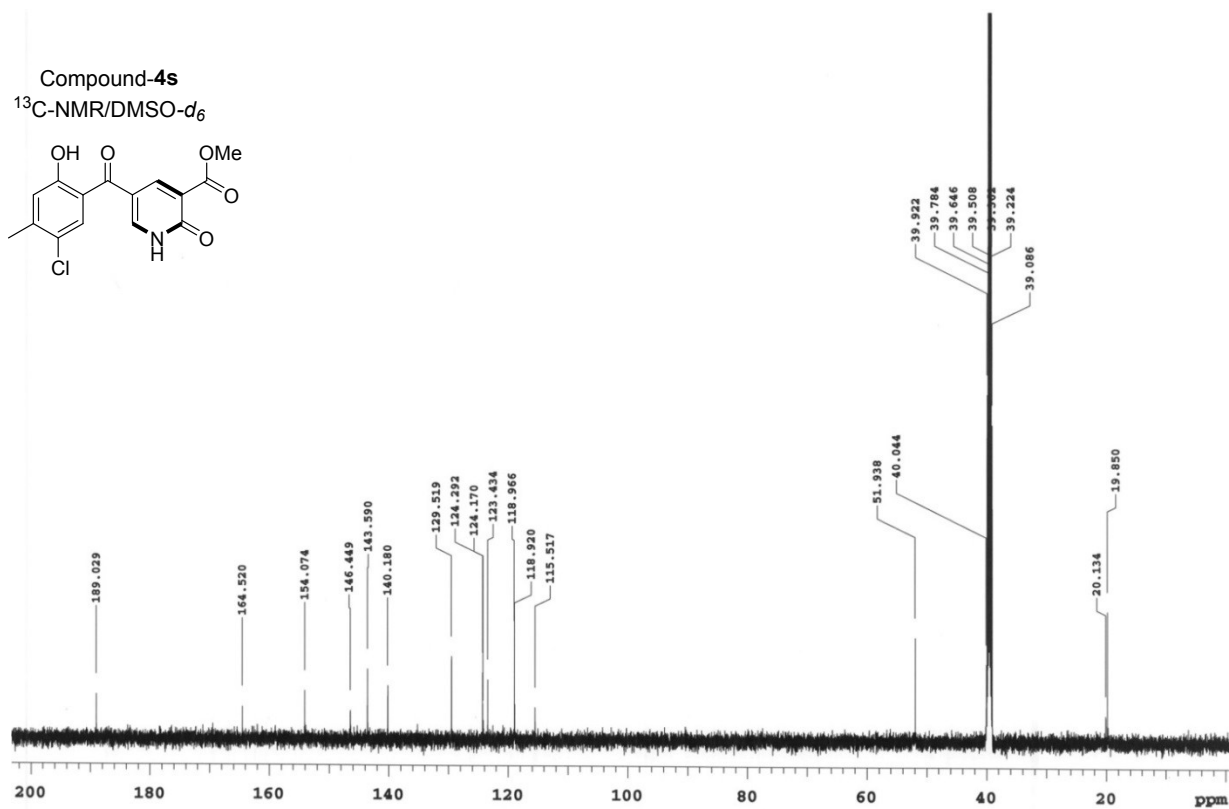

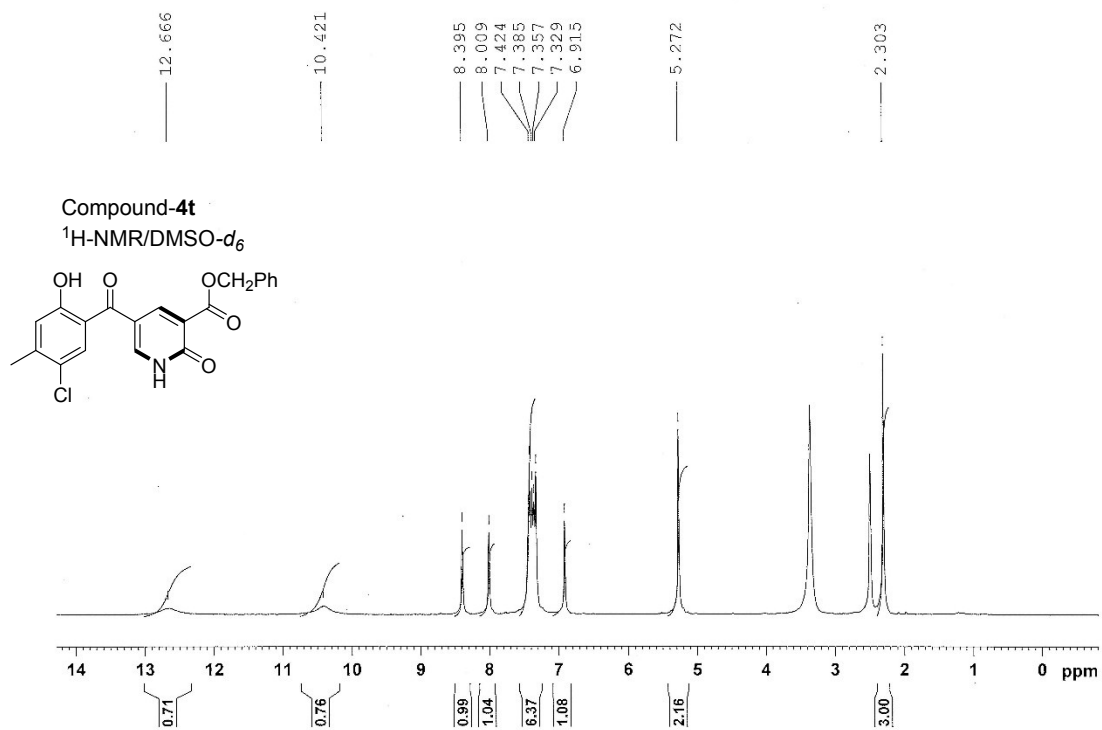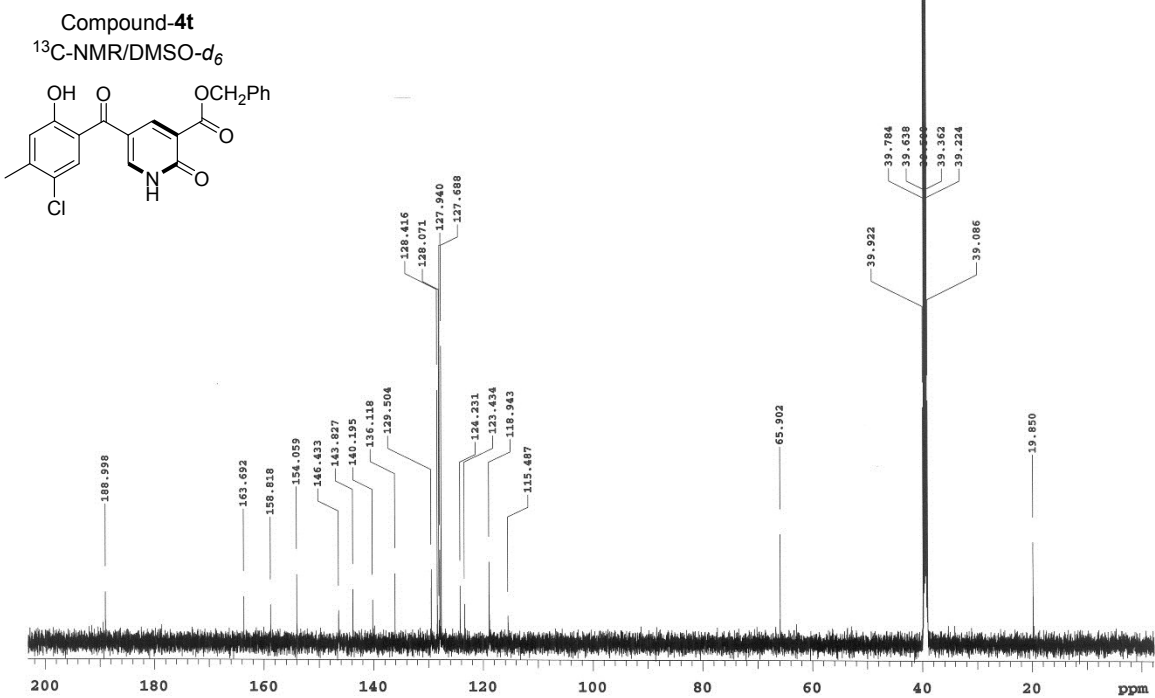

Compound-5  
<sup>1</sup>H-NMR/CDCl<sub>3</sub>

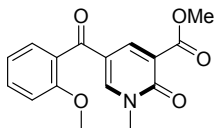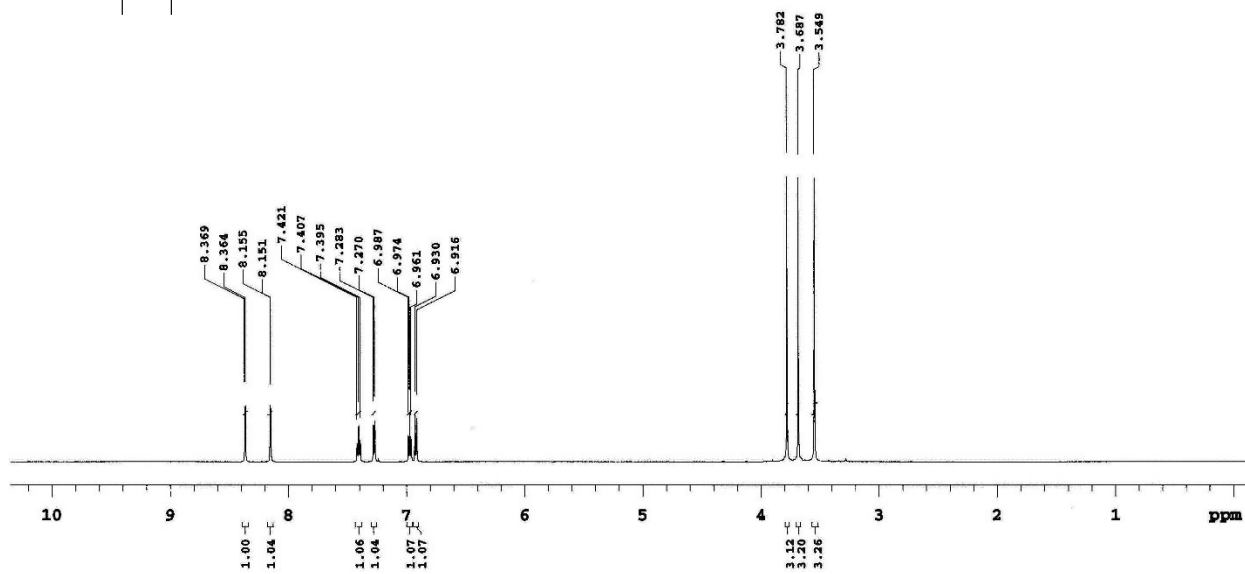

Compound-5  
<sup>13</sup>C-NMR/CDCl<sub>3</sub>

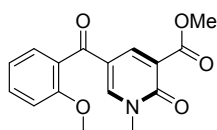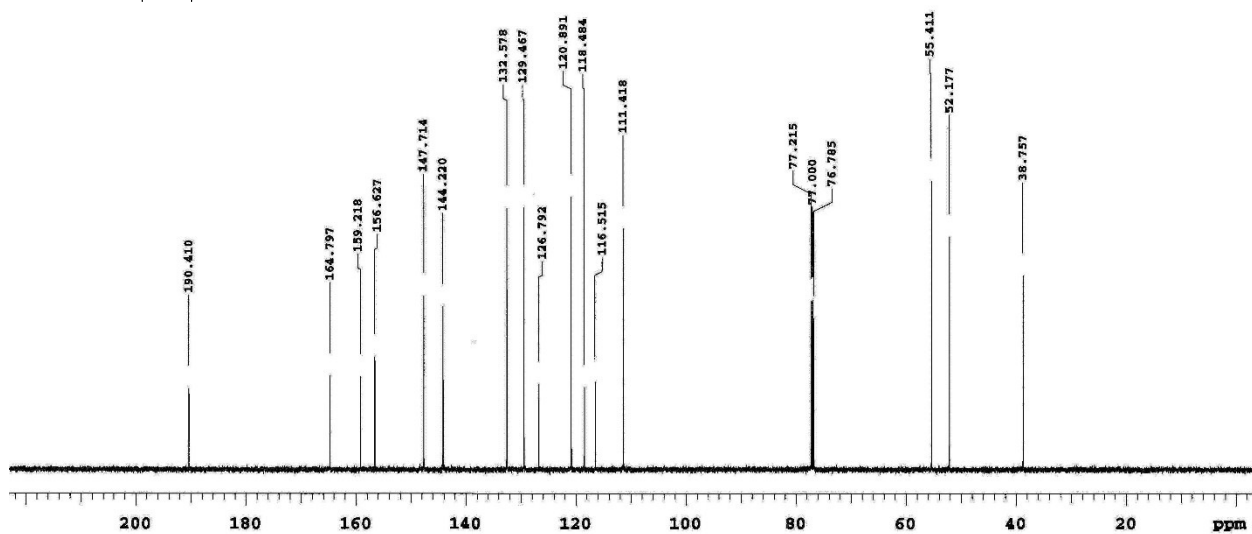

Compound-6a  
<sup>1</sup>H-NMR/DMSO-d<sub>6</sub>

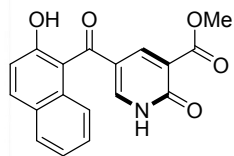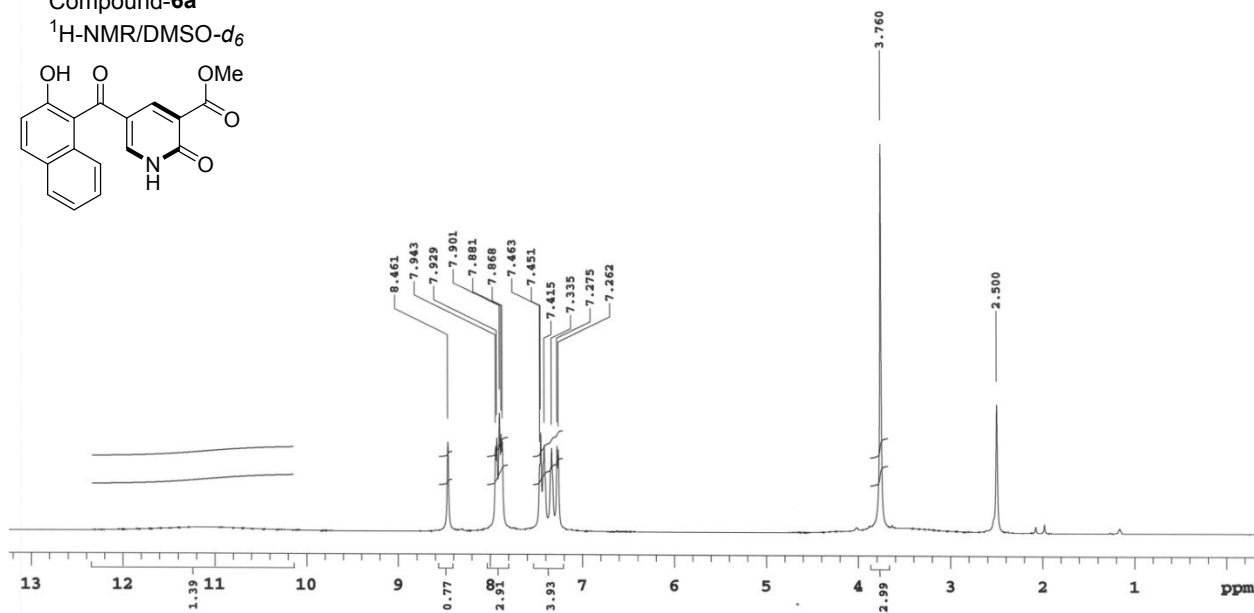

Compound-6a  
<sup>13</sup>C-NMR/DMSO-d<sub>6</sub>

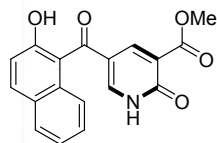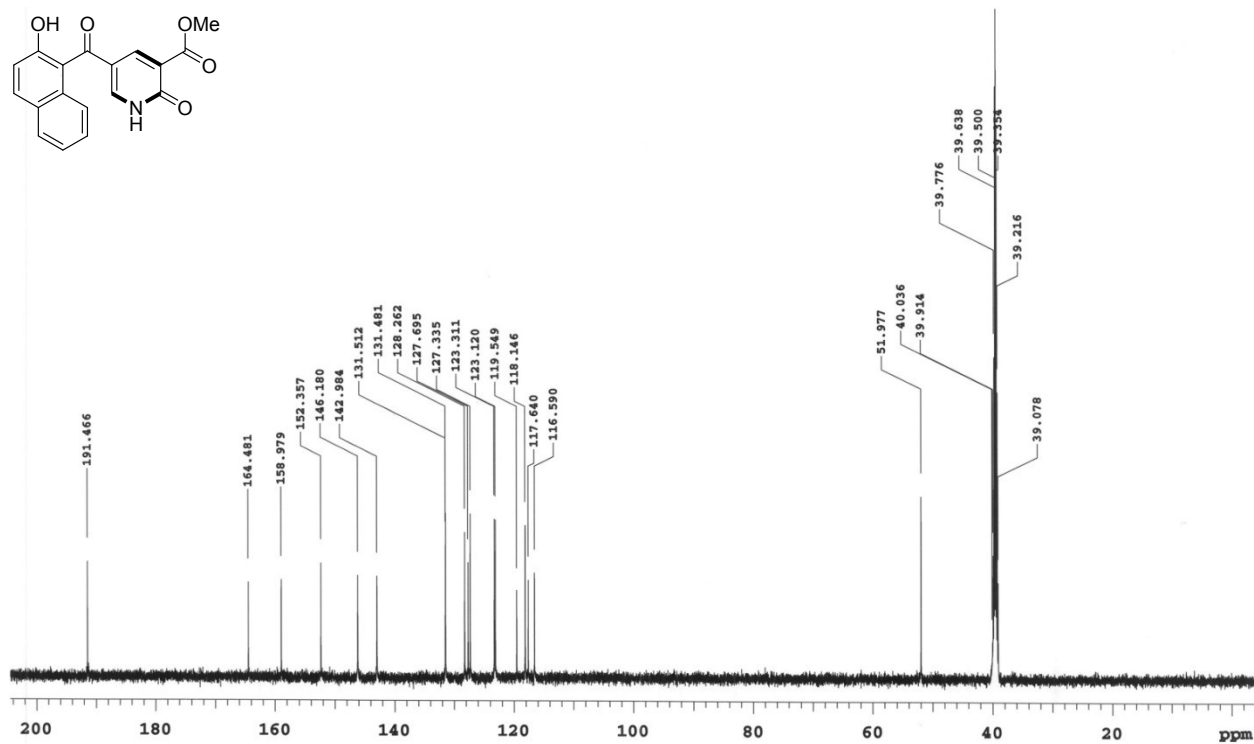



Compound-6b  
<sup>1</sup>H-NMR/DMSO-d<sub>6</sub>

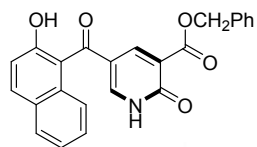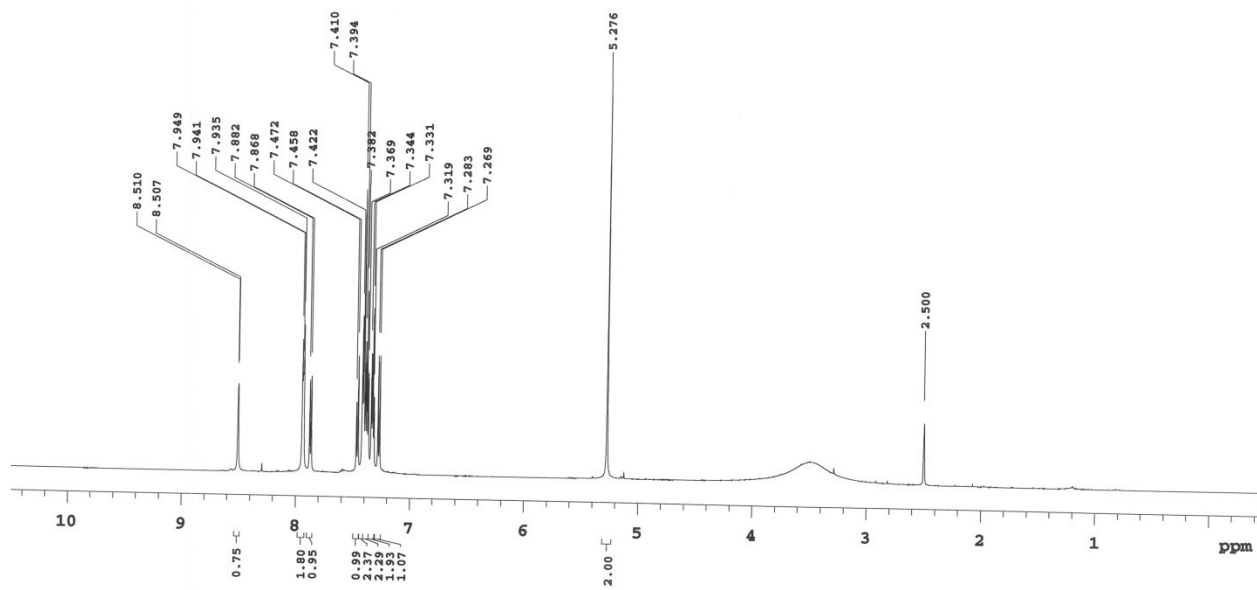

Compound-6b  
<sup>13</sup>C-NMR/DMSO-d<sub>6</sub>

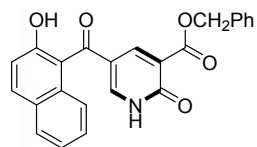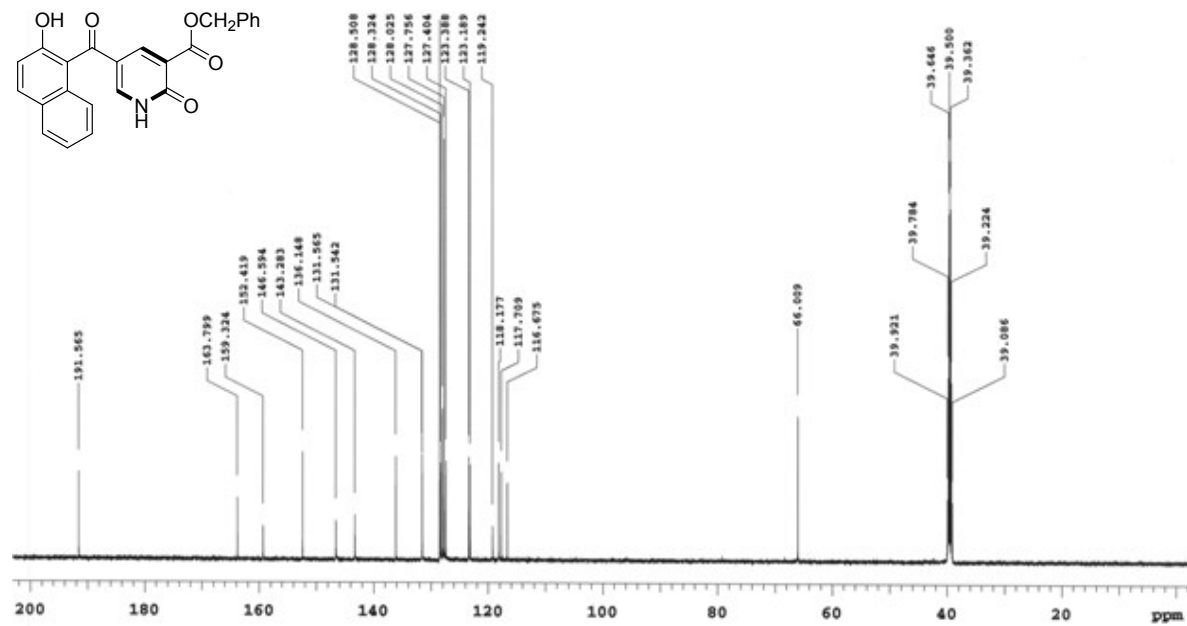



Compound-6d  
<sup>1</sup>H-NMR/DMSO-d<sub>6</sub>

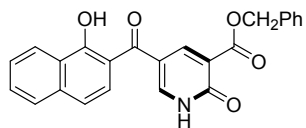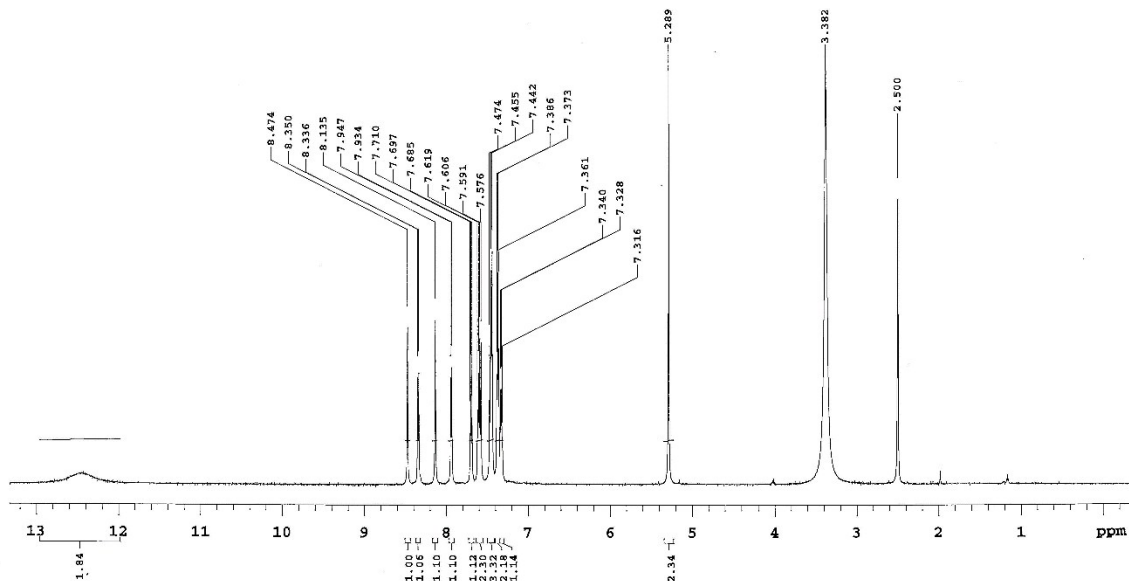

Compound-6d  
<sup>13</sup>C-NMR/DMSO-d<sub>6</sub>

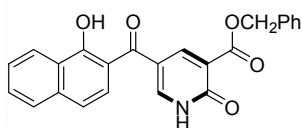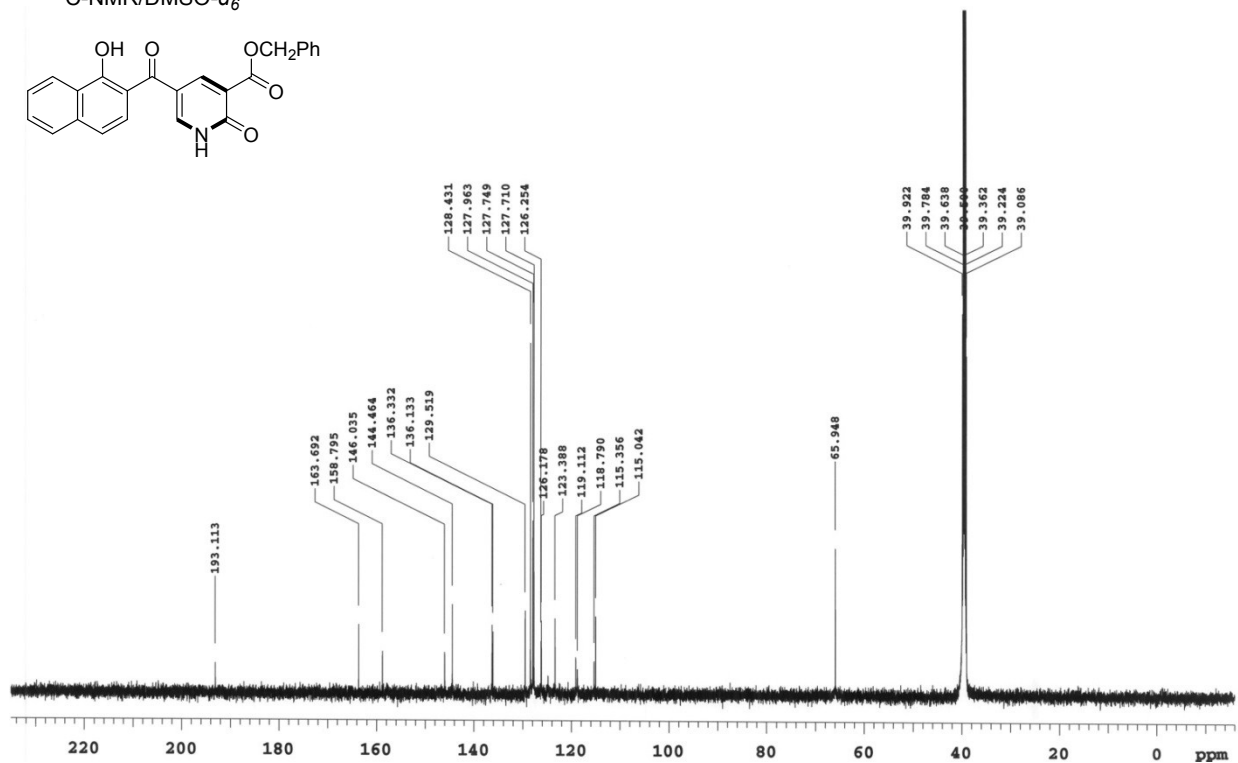

Compound-10  
<sup>1</sup>H-NMR/DMSO

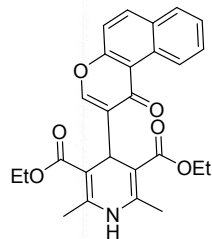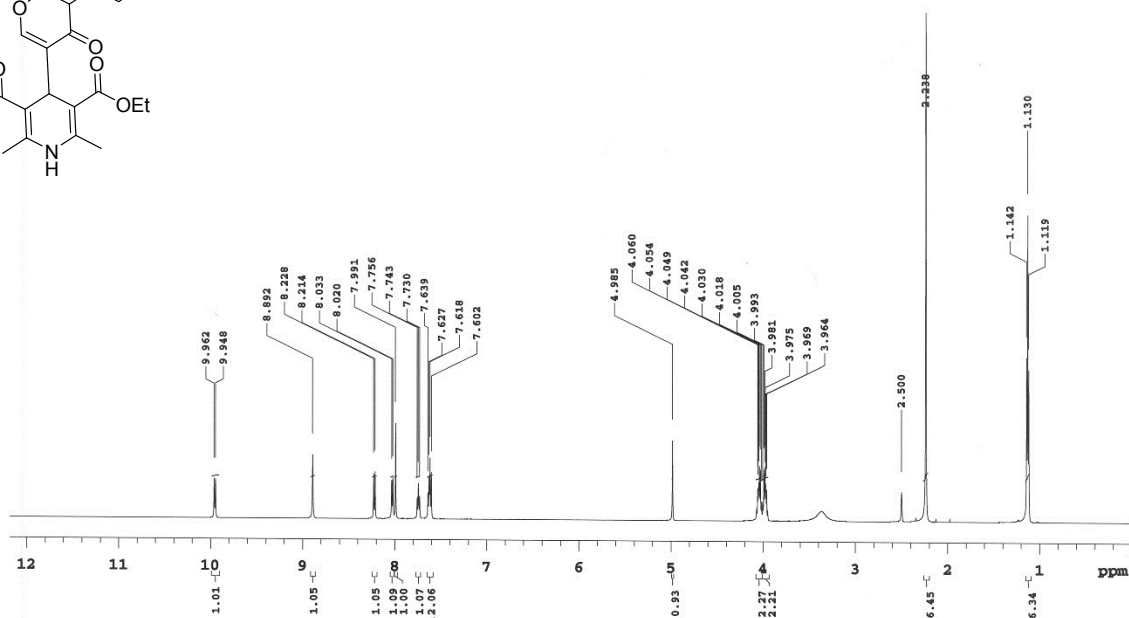

Compound-10  
<sup>13</sup>C-NMR/DMSO

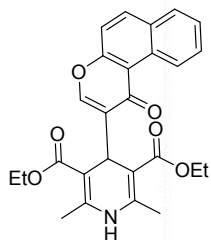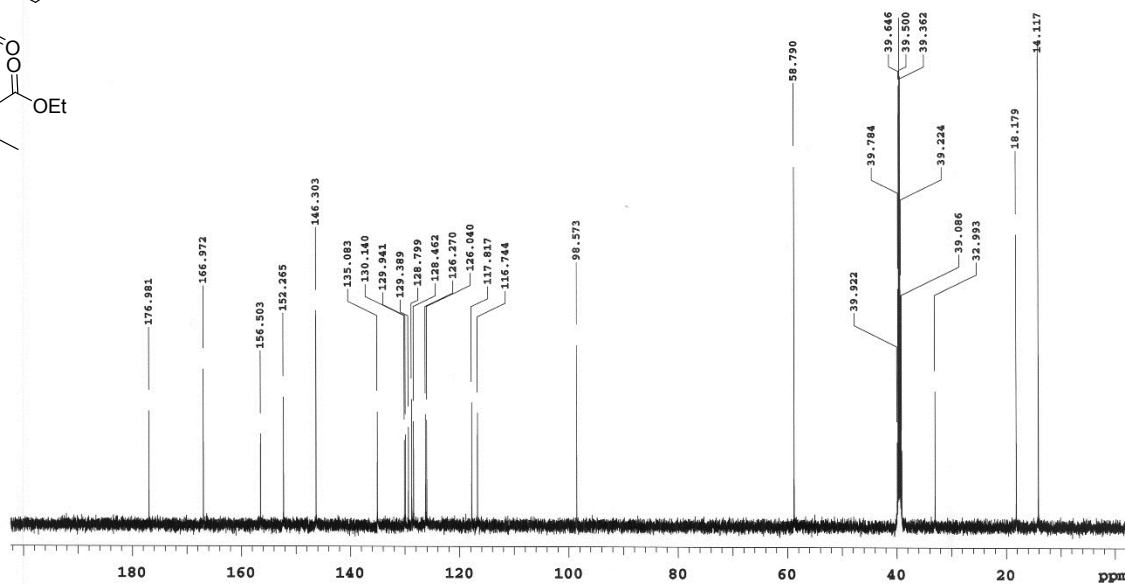

Compound-11  
<sup>1</sup>H-NMR/CDCl<sub>3</sub>

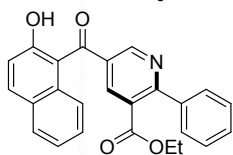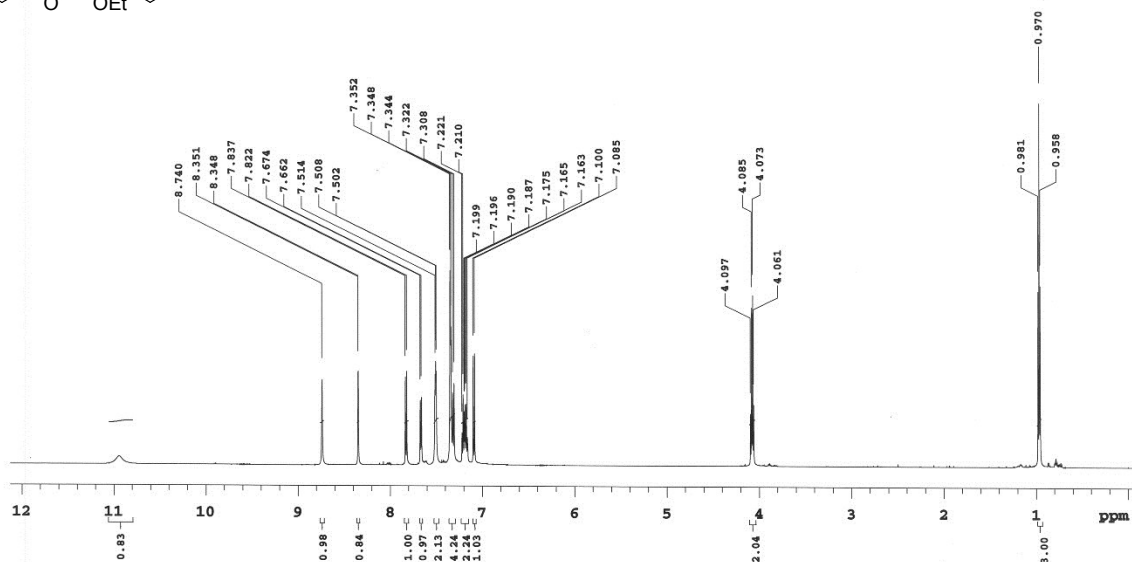

Compound-11  
<sup>13</sup>C-NMR/CDCl<sub>3</sub>

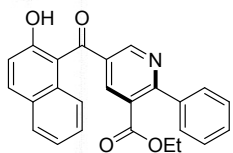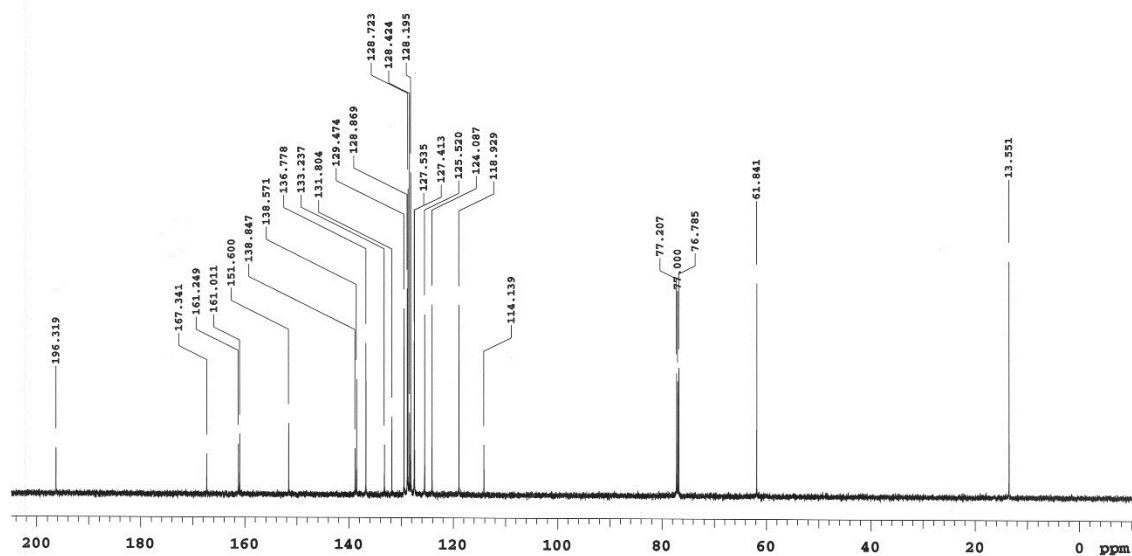

**X-Ray crystallographic structure and data of compound 5:** Empirical Formula-  $C_{16}H_{15}NO_5$ ,  $M = 301.29$ , Monoclinic, Space group  $P_{bca}$ ,  $a = 8.3195(4) \text{ \AA}$ ,  $b = 13.6469(6) \text{ \AA}$ ,  $c = 12.8427(5) \text{ \AA}$ ,  $V = 1458.10(11) \text{ \AA}^3$ ,  $Z = 4$ ,  $T = 223(2) \text{ K}$ ,  $\rho_{\text{calcd}} = 1.372 \text{ Mg/m}^3$ ,  $2\Theta_{\text{max.}} = 25.89^\circ$ , Refinement of 202 parameters on 2807 independent reflections out of 46442 collected reflections ( $R_{\text{int}} = 0.1156$ ) led to  $R_1 = 0.0616 [I > 2\sigma(I)]$ ,  $wR_2 = 0.1659$  (all data) and  $S = 1.043$  with the largest difference peak and hole of  $0.701$  and  $-0.471 \text{ e. \AA}^{-3}$  respectively. The crystal structure has been deposited at the Cambridge Crystallographic Data Centre (CCDC 1495313). The data can be obtained free of charge via the Internet at [www.ccdc.cam.ac.uk/data\\_request/cif](http://www.ccdc.cam.ac.uk/data_request/cif).

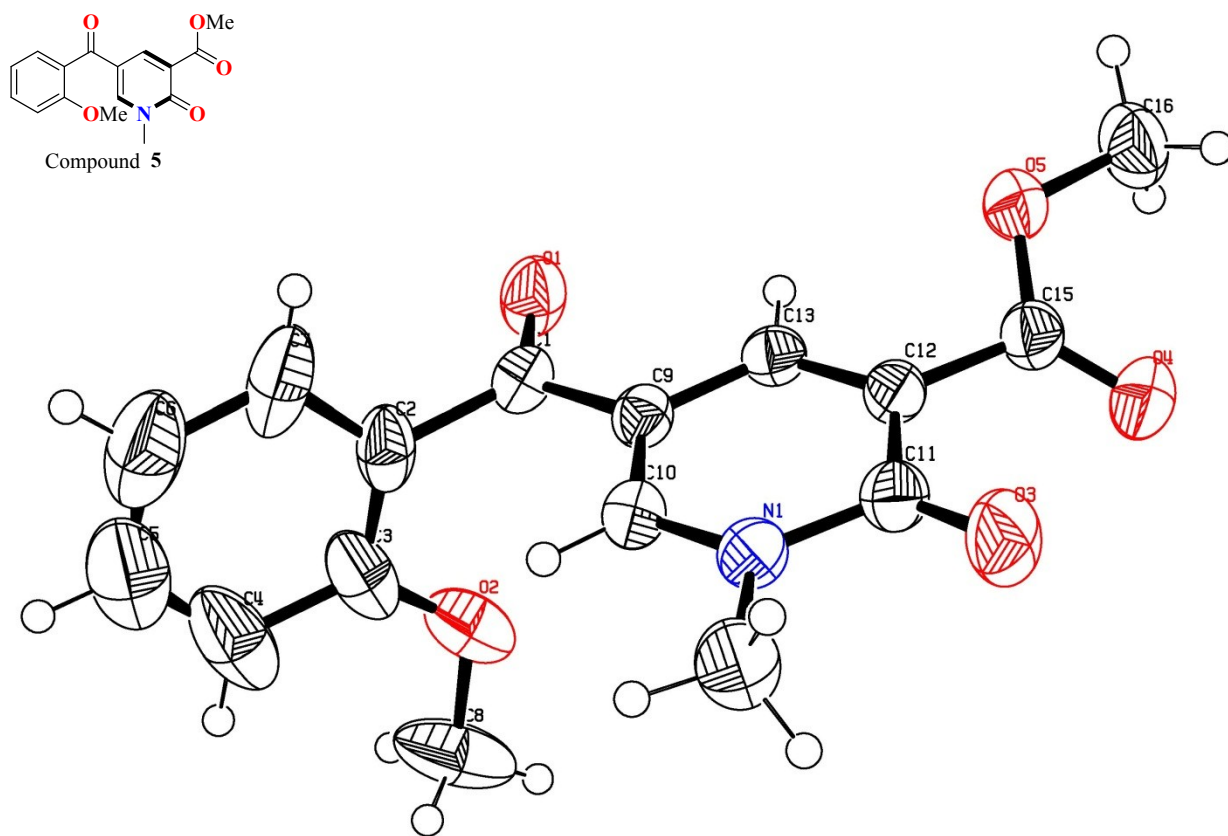

Fig. S1 X-Ray Structure of Compound 5.

## X-Ray Data of Compound 5

Table S1. Crystal data and structure refinement for **5**.

|                                   |                                                  |          |
|-----------------------------------|--------------------------------------------------|----------|
| Identification code               | <b>5</b>                                         |          |
| Empirical formula                 | C <sub>16</sub> H <sub>15</sub> N O <sub>5</sub> |          |
| Formula weight                    | 301.29                                           |          |
| Temperature                       | 223(2) K                                         |          |
| Wavelength                        | 0.71073 Å                                        |          |
| Crystal system                    | Monoclinic                                       |          |
| Space group                       | P2(1)/c                                          |          |
| Unit cell dimensions              | a = 8.3195(4) Å                                  | α = 90°. |
|                                   | b = 13.6469(6) Å                                 | β = 90°. |
|                                   | c = 12.8427(5) Å                                 | γ = 90°. |
| Volume                            | 1458.10(11) Å <sup>3</sup>                       |          |
| Z                                 | 4                                                |          |
| Density (calculated)              | 1.372 Mg/m <sup>3</sup>                          |          |
| Absorption coefficient            | 0.103 mm <sup>-1</sup>                           |          |
| F(000)                            | 632                                              |          |
| Crystal size                      | 0.24 x 0.20 x 0.19 mm <sup>3</sup>               |          |
| Theta range for data collection   | 2.18 to 25.89°.                                  |          |
| Index ranges                      | -10 ≤ h ≤ 10, -16 ≤ k ≤ 16, -15 ≤ l ≤ 15         |          |
| Reflections collected             | 46442                                            |          |
| Independent reflections           | 2807 [R(int) = 0.1156]                           |          |
| Completeness to theta = 25.89°    | 99.3 %                                           |          |
| Absorption correction             | None                                             |          |
| Max. and min. transmission        | 0.9807 and 0.9757                                |          |
| Refinement method                 | Full-matrix least-squares on F <sup>2</sup>      |          |
| Data / restraints / parameters    | 2807 / 12 / 202                                  |          |
| Goodness-of-fit on F <sup>2</sup> | 1.043                                            |          |
| Final R indices [I > 2σ(I)]       | R1 = 0.0616, wR2 = 0.1555                        |          |
| R indices (all data)              | R1 = 0.0769, wR2 = 0.1659                        |          |
| Largest diff. peak and hole       | 0.701 and -0.471 e.Å <sup>-3</sup>               |          |

Table S2. Atomic coordinates ( $\times 10^4$ ) and equivalent isotropic displacement parameters ( $\text{\AA}^2 \times 10^3$ ) or **5**. U (eq) is defined as one third of the trace of the orthogonalized  $U_{ij}$  tensor.

|       | x        | y        | z        | U(eq)  |
|-------|----------|----------|----------|--------|
| O(1)  | 9294(3)  | 10043(2) | 8707(2)  | 57(1)  |
| C(1)  | 8280(3)  | 9437(2)  | 8493(2)  | 40(1)  |
| C(2)  | 8205(4)  | 9015(3)  | 7417(2)  | 52(1)  |
| C(3)  | 8944(4)  | 8121(3)  | 7210(3)  | 66(1)  |
| C(4)  | 8970(6)  | 7743(4)  | 6201(4)  | 99(2)  |
| C(5)  | 8216(7)  | 8271(5)  | 5439(4)  | 101(2) |
| C(6)  | 7440(7)  | 9129(5)  | 5616(4)  | 97(2)  |
| C(7)  | 7443(5)  | 9533(4)  | 6630(3)  | 79(1)  |
| O(2)  | 9630(3)  | 7677(2)  | 8049(2)  | 70(1)  |
| C(8)  | 10296(5) | 6718(3)  | 7907(5)  | 94(2)  |
| C(9)  | 7091(3)  | 9110(2)  | 9267(2)  | 37(1)  |
| C(10) | 5914(3)  | 8451(2)  | 9030(2)  | 40(1)  |
| N(1)  | 4828(3)  | 8150(2)  | 9740(2)  | 43(1)  |
| C(11) | 4848(4)  | 8456(2)  | 10791(2) | 45(1)  |
| C(12) | 6102(3)  | 9151(2)  | 11036(2) | 39(1)  |
| C(13) | 7153(3)  | 9466(2)  | 10295(2) | 38(1)  |
| C(14) | 3539(5)  | 7483(3)  | 9426(3)  | 65(1)  |
| O(3)  | 3827(3)  | 8144(2)  | 11388(2) | 70(1)  |
| C(15) | 6291(4)  | 9476(2)  | 12132(2) | 44(1)  |
| O(4)  | 6062(4)  | 8981(2)  | 12892(2) | 66(1)  |
| O(5)  | 6809(3)  | 10399(2) | 12167(2) | 51(1)  |
| C(16) | 7185(5)  | 10782(3) | 13184(3) | 64(1)  |



Table S3. Bond lengths [ $\text{\AA}$ ] and angles [ $^\circ$ ] for **5**.

---

|              |          |
|--------------|----------|
| O(1)-C(1)    | 1.212(4) |
| C(1)-C(9)    | 1.471(4) |
| C(1)-C(2)    | 1.499(4) |
| C(2)-C(7)    | 1.387(5) |
| C(2)-C(3)    | 1.392(6) |
| C(3)-O(2)    | 1.362(5) |
| C(3)-C(4)    | 1.394(5) |
| C(4)-C(5)    | 1.368(8) |
| C(4)-H(4)    | 0.9400   |
| C(5)-C(6)    | 1.357(8) |
| C(5)-H(5)    | 0.9400   |
| C(6)-C(7)    | 1.413(7) |
| C(6)-H(6)    | 0.9400   |
| C(7)-H(7)    | 0.9400   |
| O(2)-C(8)    | 1.432(5) |
| C(8)-H(8A)   | 0.9700   |
| C(8)-H(8B)   | 0.9700   |
| C(8)-H(8C)   | 0.9700   |
| C(9)-C(10)   | 1.365(4) |
| C(9)-C(13)   | 1.408(4) |
| C(10)-N(1)   | 1.348(4) |
| C(10)-H(10)  | 0.9400   |
| N(1)-C(11)   | 1.413(4) |
| N(1)-C(14)   | 1.463(4) |
| C(11)-O(3)   | 1.221(4) |
| C(11)-C(12)  | 1.444(4) |
| C(12)-C(13)  | 1.362(4) |
| C(12)-C(15)  | 1.485(4) |
| C(13)-H(13)  | 0.9400   |
| C(14)-H(14A) | 0.9700   |
| C(14)-H(14B) | 0.9700   |
| C(14)-H(14C) | 0.9700   |
| C(15)-O(4)   | 1.202(4) |
| C(15)-O(5)   | 1.332(4) |

|                  |          |
|------------------|----------|
| O(5)-C(16)       | 1.441(4) |
| C(16)-H(16A)     | 0.9700   |
| C(16)-H(16B)     | 0.9700   |
| C(16)-H(16C)     | 0.9700   |
| O(1)-C(1)-C(9)   | 121.4(3) |
| O(1)-C(1)-C(2)   | 120.0(3) |
| C(9)-C(1)-C(2)   | 118.6(3) |
| C(7)-C(2)-C(3)   | 120.6(4) |
| C(7)-C(2)-C(1)   | 119.7(4) |
| C(3)-C(2)-C(1)   | 119.7(3) |
| O(2)-C(3)-C(2)   | 115.1(3) |
| O(2)-C(3)-C(4)   | 124.4(5) |
| C(2)-C(3)-C(4)   | 120.6(5) |
| C(5)-C(4)-C(3)   | 117.6(6) |
| C(5)-C(4)-H(4)   | 121.2    |
| C(3)-C(4)-H(4)   | 121.2    |
| C(6)-C(5)-C(4)   | 123.6(5) |
| C(6)-C(5)-H(5)   | 118.2    |
| C(4)-C(5)-H(5)   | 118.2    |
| C(5)-C(6)-C(7)   | 119.3(5) |
| C(5)-C(6)-H(6)   | 120.3    |
| C(7)-C(6)-H(6)   | 120.3    |
| C(2)-C(7)-C(6)   | 118.3(5) |
| C(2)-C(7)-H(7)   | 120.9    |
| C(6)-C(7)-H(7)   | 120.9    |
| C(3)-O(2)-C(8)   | 117.9(4) |
| O(2)-C(8)-H(8A)  | 109.5    |
| O(2)-C(8)-H(8B)  | 109.5    |
| H(8A)-C(8)-H(8B) | 109.5    |
| O(2)-C(8)-H(8C)  | 109.5    |
| H(8A)-C(8)-H(8C) | 109.5    |
| H(8B)-C(8)-H(8C) | 109.5    |
| C(10)-C(9)-C(13) | 117.6(3) |
| C(10)-C(9)-C(1)  | 122.1(3) |
| C(13)-C(9)-C(1)  | 120.3(3) |

|                     |          |
|---------------------|----------|
| N(1)-C(10)-C(9)     | 122.0(3) |
| N(1)-C(10)-H(10)    | 119.0    |
| C(9)-C(10)-H(10)    | 119.0    |
| C(10)-N(1)-C(11)    | 123.3(3) |
| C(10)-N(1)-C(14)    | 119.6(3) |
| C(11)-N(1)-C(14)    | 117.2(3) |
| O(3)-C(11)-N(1)     | 119.3(3) |
| O(3)-C(11)-C(12)    | 126.5(3) |
| N(1)-C(11)-C(12)    | 114.2(2) |
| C(13)-C(12)-C(11)   | 121.3(3) |
| C(13)-C(12)-C(15)   | 120.0(3) |
| C(11)-C(12)-C(15)   | 118.6(3) |
| C(12)-C(13)-C(9)    | 121.5(3) |
| C(12)-C(13)-H(13)   | 119.3    |
| C(9)-C(13)-H(13)    | 119.3    |
| N(1)-C(14)-H(14A)   | 109.5    |
| N(1)-C(14)-H(14B)   | 109.5    |
| H(14A)-C(14)-H(14B) | 109.5    |
| N(1)-C(14)-H(14C)   | 109.5    |
| H(14A)-C(14)-H(14C) | 109.5    |
| H(14B)-C(14)-H(14C) | 109.5    |
| O(4)-C(15)-O(5)     | 123.7(3) |
| O(4)-C(15)-C(12)    | 125.8(3) |
| O(5)-C(15)-C(12)    | 110.4(2) |
| C(15)-O(5)-C(16)    | 116.3(3) |
| O(5)-C(16)-H(16A)   | 109.5    |
| O(5)-C(16)-H(16B)   | 109.5    |
| H(16A)-C(16)-H(16B) | 109.5    |
| O(5)-C(16)-H(16C)   | 109.5    |
| H(16A)-C(16)-H(16C) | 109.5    |
| H(16B)-C(16)-H(16C) | 109.5    |

---

Symmetry transformations used to generate equivalent atoms:

Table S4. Anisotropic displacement parameters ( $\text{\AA}^2 \times 10^3$ ) for 332. The anisotropic displacement factor exponent takes the form:  $-2\pi^2 [ h^2 a^{*2} U_{11} + \dots + 2 h k a^* b^* U_{12} ]$

|       | U11    | U22    | U33    | U23    | U13    | U12    |
|-------|--------|--------|--------|--------|--------|--------|
| O(1)  | 60(1)  | 66(2)  | 45(1)  | 3(1)   | 1(1)   | -24(1) |
| C(1)  | 38(2)  | 44(2)  | 39(2)  | 7(1)   | -1(1)  | -2(1)  |
| C(2)  | 48(2)  | 74(2)  | 34(2)  | 1(2)   | 5(1)   | -24(2) |
| C(3)  | 56(2)  | 86(3)  | 54(2)  | -28(2) | 19(2)  | -34(2) |
| C(4)  | 99(3)  | 121(4) | 77(3)  | -47(3) | 37(3)  | -71(3) |
| C(5)  | 111(3) | 126(3) | 65(2)  | -13(2) | 12(2)  | -70(3) |
| C(6)  | 104(3) | 124(3) | 63(2)  | 26(2)  | -13(2) | -53(2) |
| C(7)  | 79(3)  | 114(4) | 45(2)  | 26(2)  | -12(2) | -43(3) |
| O(2)  | 65(2)  | 61(2)  | 84(2)  | -27(1) | 5(1)   | 4(1)   |
| C(8)  | 57(2)  | 60(2)  | 164(5) | -47(3) | 29(3)  | -6(2)  |
| C(9)  | 36(1)  | 38(2)  | 36(2)  | 4(1)   | 1(1)   | 3(1)   |
| C(10) | 40(2)  | 43(2)  | 37(2)  | 3(1)   | 1(1)   | 1(1)   |
| N(1)  | 41(1)  | 43(1)  | 45(1)  | 1(1)   | 5(1)   | -7(1)  |
| C(11) | 45(2)  | 44(2)  | 46(2)  | 1(1)   | 10(1)  | 0(1)   |
| C(12) | 41(2)  | 37(2)  | 38(2)  | 2(1)   | 4(1)   | 4(1)   |
| C(13) | 38(2)  | 35(1)  | 40(2)  | 2(1)   | -1(1)  | 2(1)   |
| C(14) | 61(2)  | 71(2)  | 61(2)  | -8(2)  | 8(2)   | -28(2) |
| O(3)  | 68(2)  | 81(2)  | 60(2)  | -7(1)  | 28(1)  | -26(1) |
| C(15) | 47(2)  | 46(2)  | 40(2)  | 2(1)   | 6(1)   | 4(1)   |
| O(4)  | 96(2)  | 62(2)  | 40(1)  | 8(1)   | 8(1)   | -8(1)  |
| O(5)  | 65(1)  | 49(1)  | 38(1)  | -3(1)  | 2(1)   | -5(1)  |
| C(16) | 79(3)  | 71(2)  | 44(2)  | -13(2) | 2(2)   | -14(2) |

Table S5. Hydrogen coordinates ( $\times 10^4$ ) and isotropic displacement parameters ( $\text{\AA}^2 \times 10^{-3}$ ) for **5**.

|        | x     | y     | z     | U(eq) |
|--------|-------|-------|-------|-------|
| H(4)   | 9486  | 7147  | 6051  | 119   |
| H(5)   | 8238  | 8026  | 4755  | 121   |
| H(6)   | 6906  | 9453  | 5070  | 116   |
| H(7)   | 6941  | 10136 | 6767  | 95    |
| H(8A)  | 9493  | 6291  | 7601  | 141   |
| H(8B)  | 10627 | 6456  | 8576  | 141   |
| H(8C)  | 11220 | 6757  | 7448  | 141   |
| H(10)  | 5859  | 8198  | 8350  | 48    |
| H(13)  | 7938  | 9932  | 10475 | 45    |
| H(14A) | 3670  | 7313  | 8698  | 97    |
| H(14B) | 2508  | 7802  | 9525  | 97    |
| H(14C) | 3585  | 6894  | 9846  | 97    |
| H(16A) | 6271  | 10691 | 13642 | 97    |
| H(16B) | 7431  | 11475 | 13129 | 97    |
| H(16C) | 8108  | 10437 | 13465 | 97    |

Table S6. Torsion angles [°] for **5**.

---

|                        |           |
|------------------------|-----------|
| O(1)-C(1)-C(2)-C(7)    | -81.4(4)  |
| C(9)-C(1)-C(2)-C(7)    | 97.8(4)   |
| O(1)-C(1)-C(2)-C(3)    | 96.5(4)   |
| C(9)-C(1)-C(2)-C(3)    | -84.3(4)  |
| C(7)-C(2)-C(3)-O(2)    | -179.1(3) |
| C(1)-C(2)-C(3)-O(2)    | 3.0(4)    |
| C(7)-C(2)-C(3)-C(4)    | 1.7(5)    |
| C(1)-C(2)-C(3)-C(4)    | -176.2(3) |
| O(2)-C(3)-C(4)-C(5)    | 179.5(4)  |
| C(2)-C(3)-C(4)-C(5)    | -1.4(6)   |
| C(3)-C(4)-C(5)-C(6)    | -0.7(7)   |
| C(4)-C(5)-C(6)-C(7)    | 2.4(7)    |
| C(3)-C(2)-C(7)-C(6)    | -0.1(5)   |
| C(1)-C(2)-C(7)-C(6)    | 177.9(3)  |
| C(5)-C(6)-C(7)-C(2)    | -1.9(6)   |
| C(2)-C(3)-O(2)-C(8)    | 175.0(3)  |
| C(4)-C(3)-O(2)-C(8)    | -5.9(5)   |
| O(1)-C(1)-C(9)-C(10)   | 178.1(3)  |
| C(2)-C(1)-C(9)-C(10)   | -1.1(4)   |
| O(1)-C(1)-C(9)-C(13)   | -2.8(4)   |
| C(2)-C(1)-C(9)-C(13)   | 178.0(3)  |
| C(13)-C(9)-C(10)-N(1)  | 0.7(4)    |
| C(1)-C(9)-C(10)-N(1)   | 179.8(3)  |
| C(9)-C(10)-N(1)-C(11)  | -2.6(4)   |
| C(9)-C(10)-N(1)-C(14)  | 176.6(3)  |
| C(10)-N(1)-C(11)-O(3)  | -179.5(3) |
| C(14)-N(1)-C(11)-O(3)  | 1.3(5)    |
| C(10)-N(1)-C(11)-C(12) | 2.2(4)    |
| C(14)-N(1)-C(11)-C(12) | -177.0(3) |
| O(3)-C(11)-C(12)-C(13) | -178.3(3) |
| N(1)-C(11)-C(12)-C(13) | -0.1(4)   |
| O(3)-C(11)-C(12)-C(15) | 5.3(5)    |
| N(1)-C(11)-C(12)-C(15) | -176.5(3) |
| C(11)-C(12)-C(13)-C(9) | -1.7(4)   |

|                        |           |
|------------------------|-----------|
| C(15)-C(12)-C(13)-C(9) | 174.7(3)  |
| C(10)-C(9)-C(13)-C(12) | 1.4(4)    |
| C(1)-C(9)-C(13)-C(12)  | -177.8(3) |
| C(13)-C(12)-C(15)-O(4) | -142.0(3) |
| C(11)-C(12)-C(15)-O(4) | 34.4(5)   |
| C(13)-C(12)-C(15)-O(5) | 35.9(4)   |
| C(11)-C(12)-C(15)-O(5) | -147.6(3) |
| O(4)-C(15)-O(5)-C(16)  | 3.5(5)    |
| C(12)-C(15)-O(5)-C(16) | -174.5(3) |

---

Symmetry transformations used to generate equivalent atoms:
